# Supplementary material for: Preclinical Study Using ABT263 to Increase Enzalutamide Sensitivity to Suppress Prostate Cancer Progression Via Targeting BCL2/ROS/USP26 Axis Through Altering ARv7 Protein Degradation
Source: MDPI journal article supplement (doi:10.3390/cancers12040831), 2020-03-30

# Figure 1C

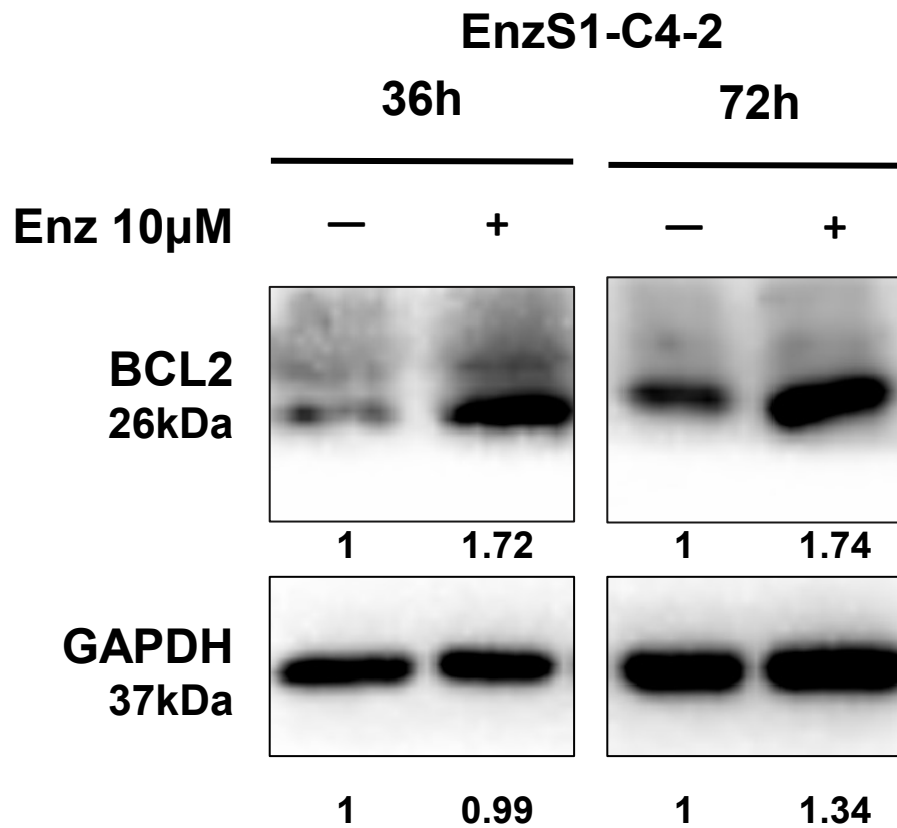

# Figure 1D

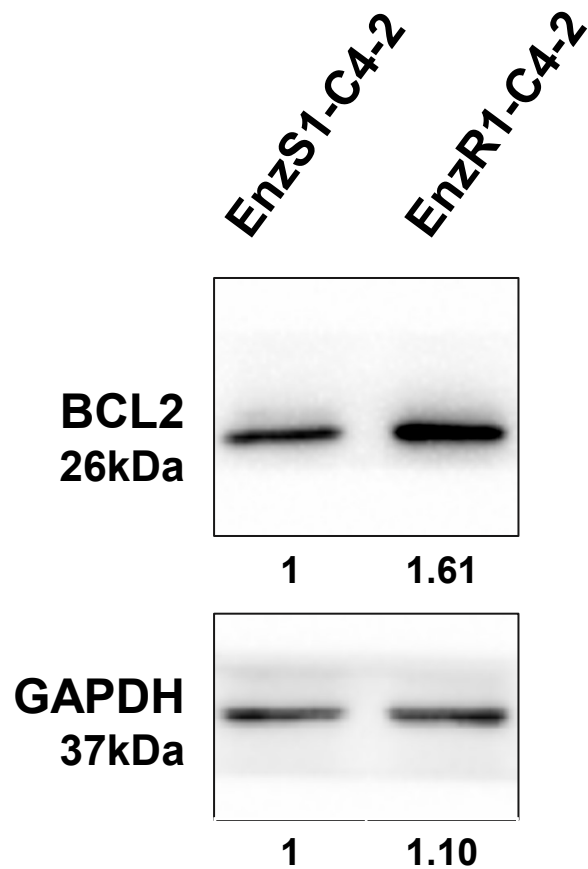

# Figure 2A

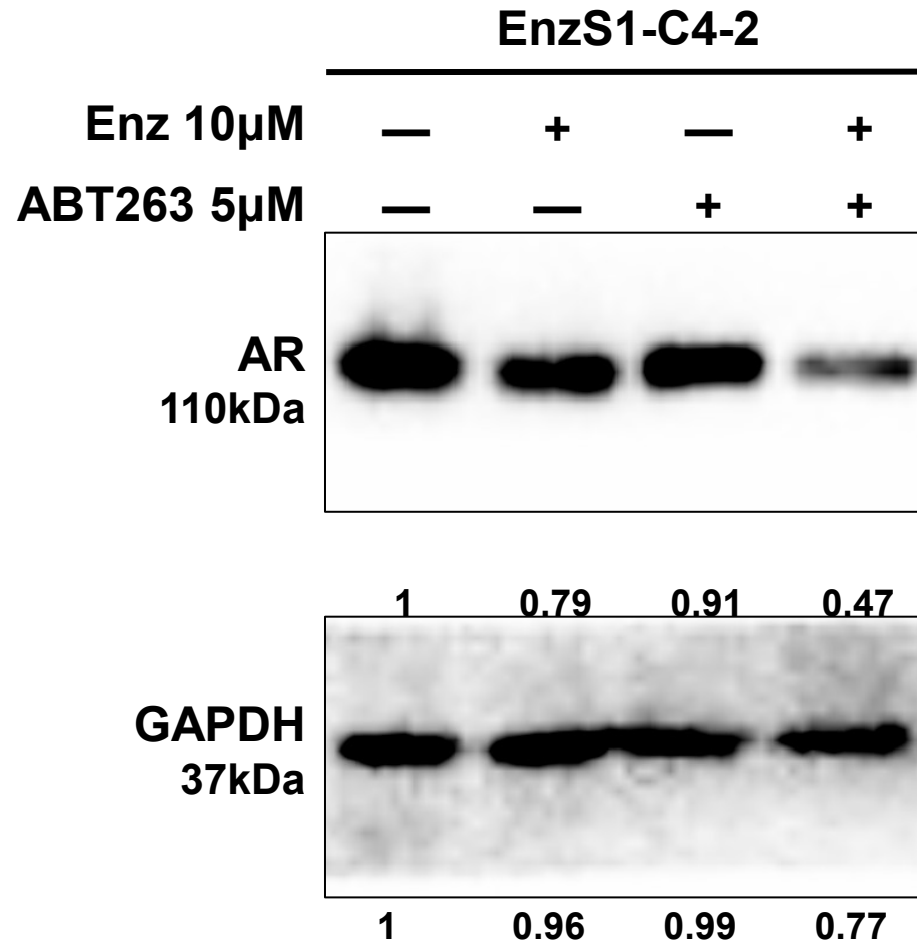

# Figure 2A

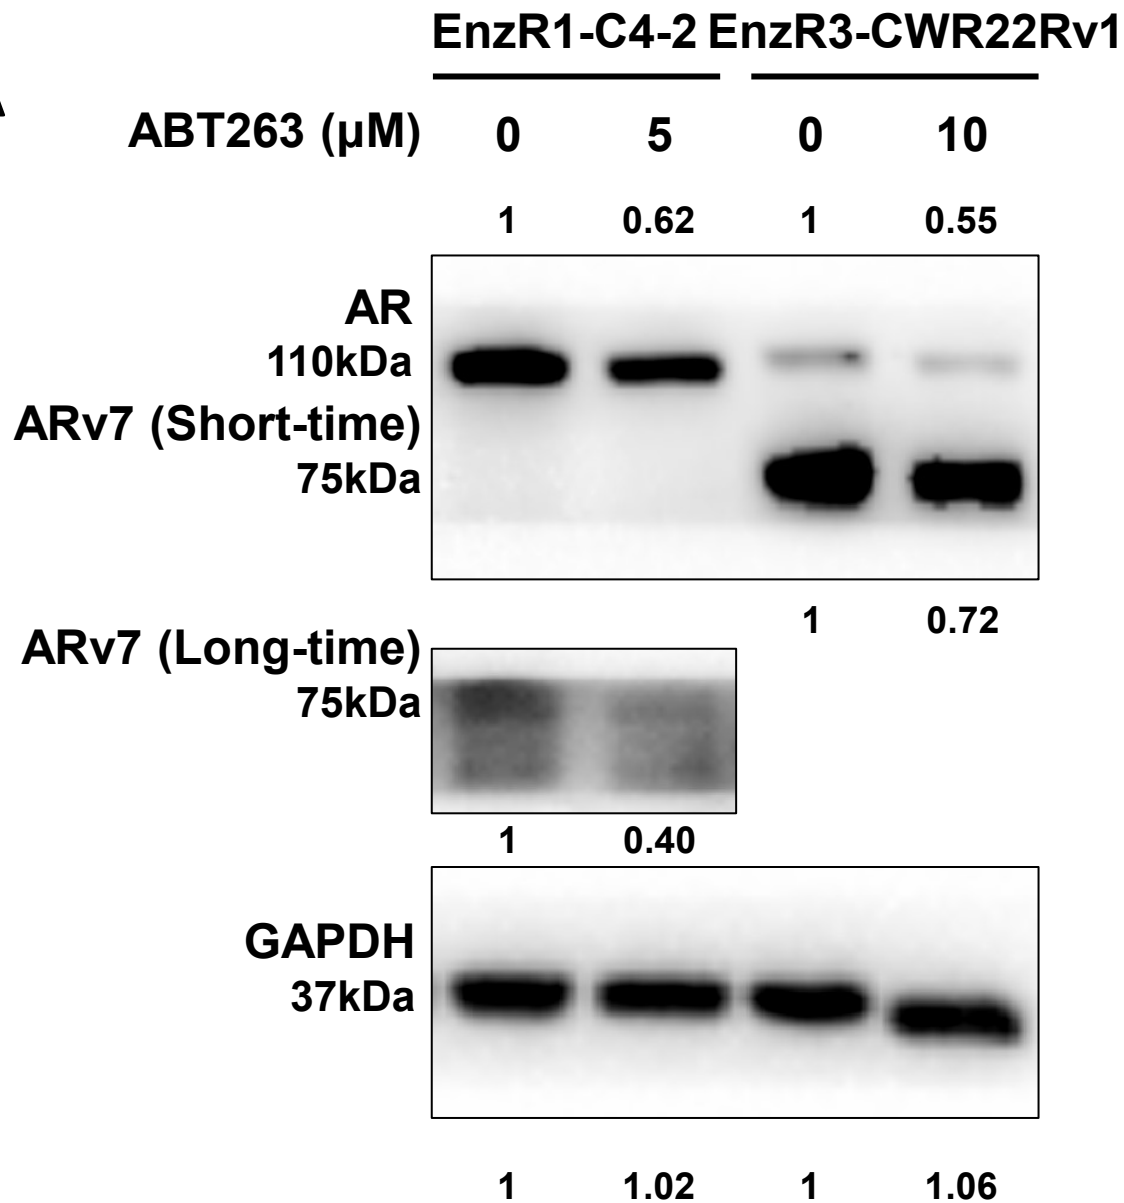

# Figure 2C

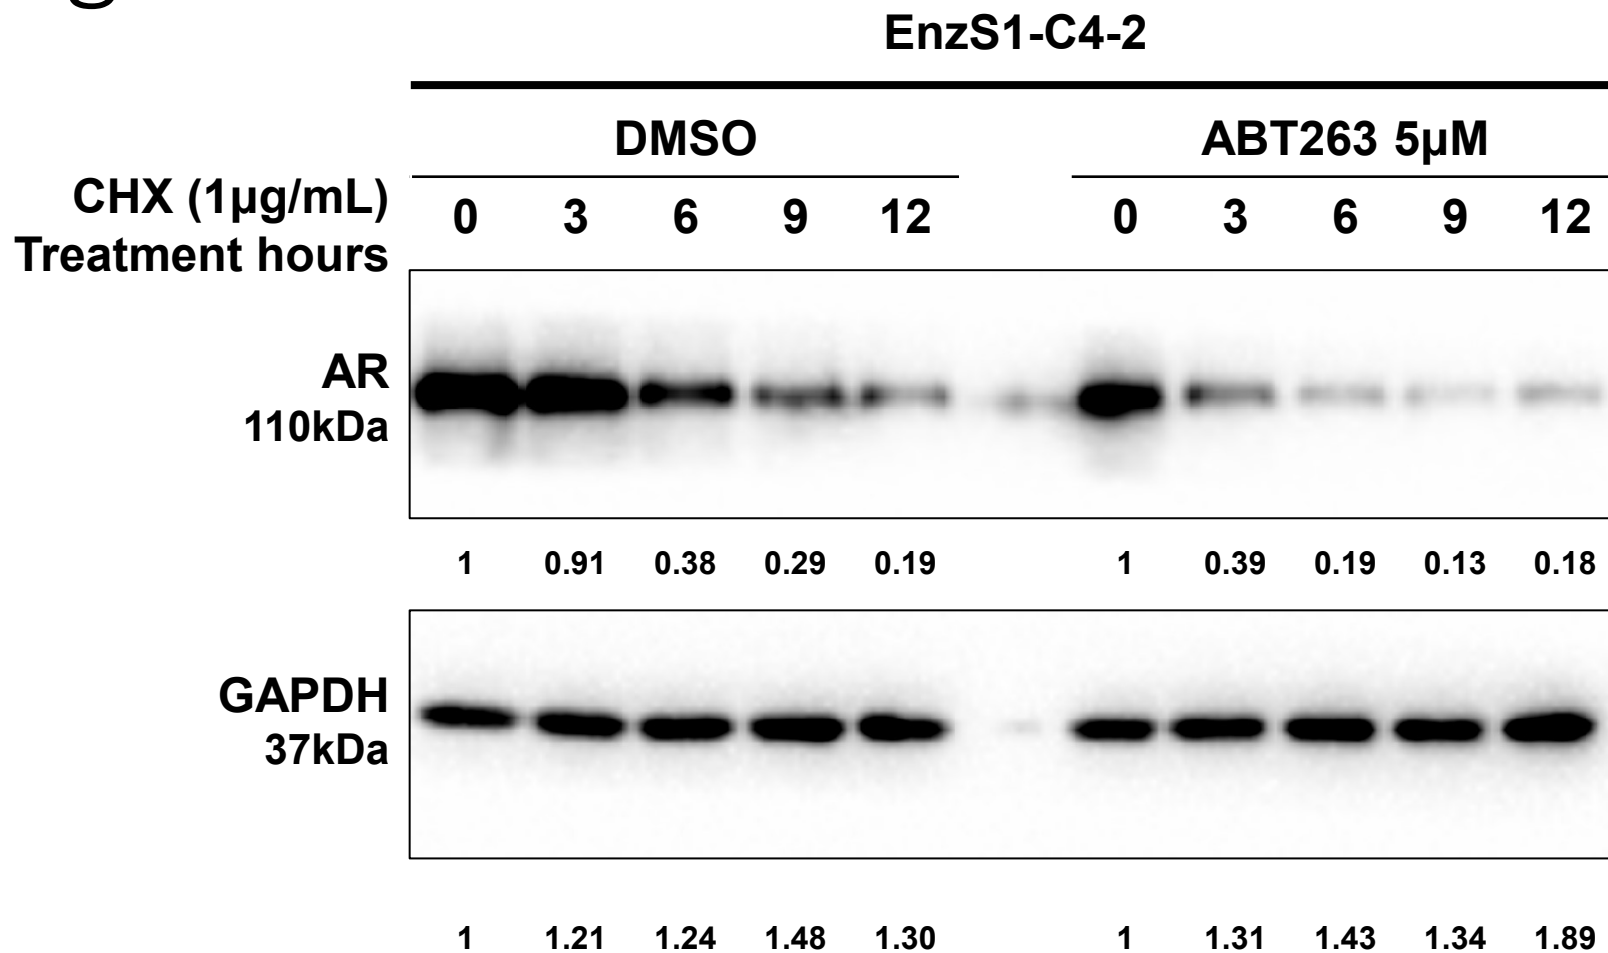

# Figure 2D

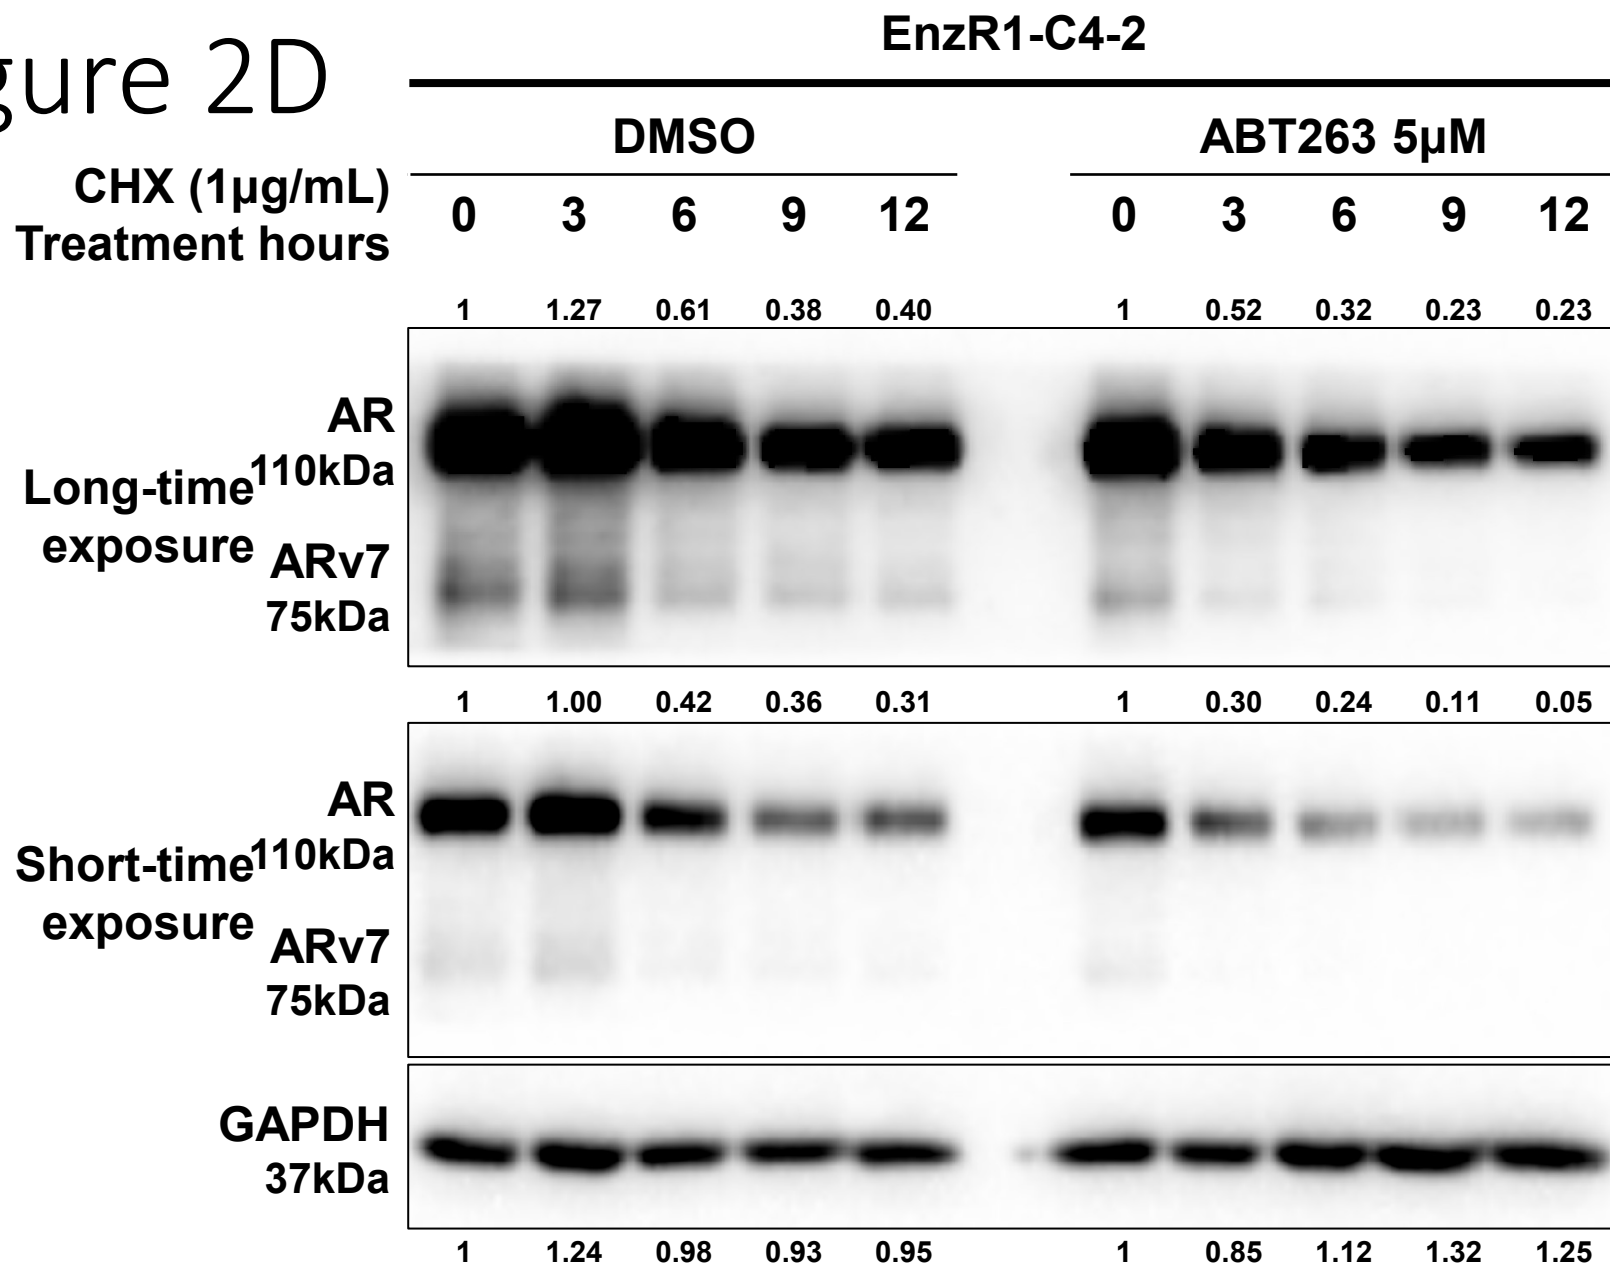

# Figure 2E

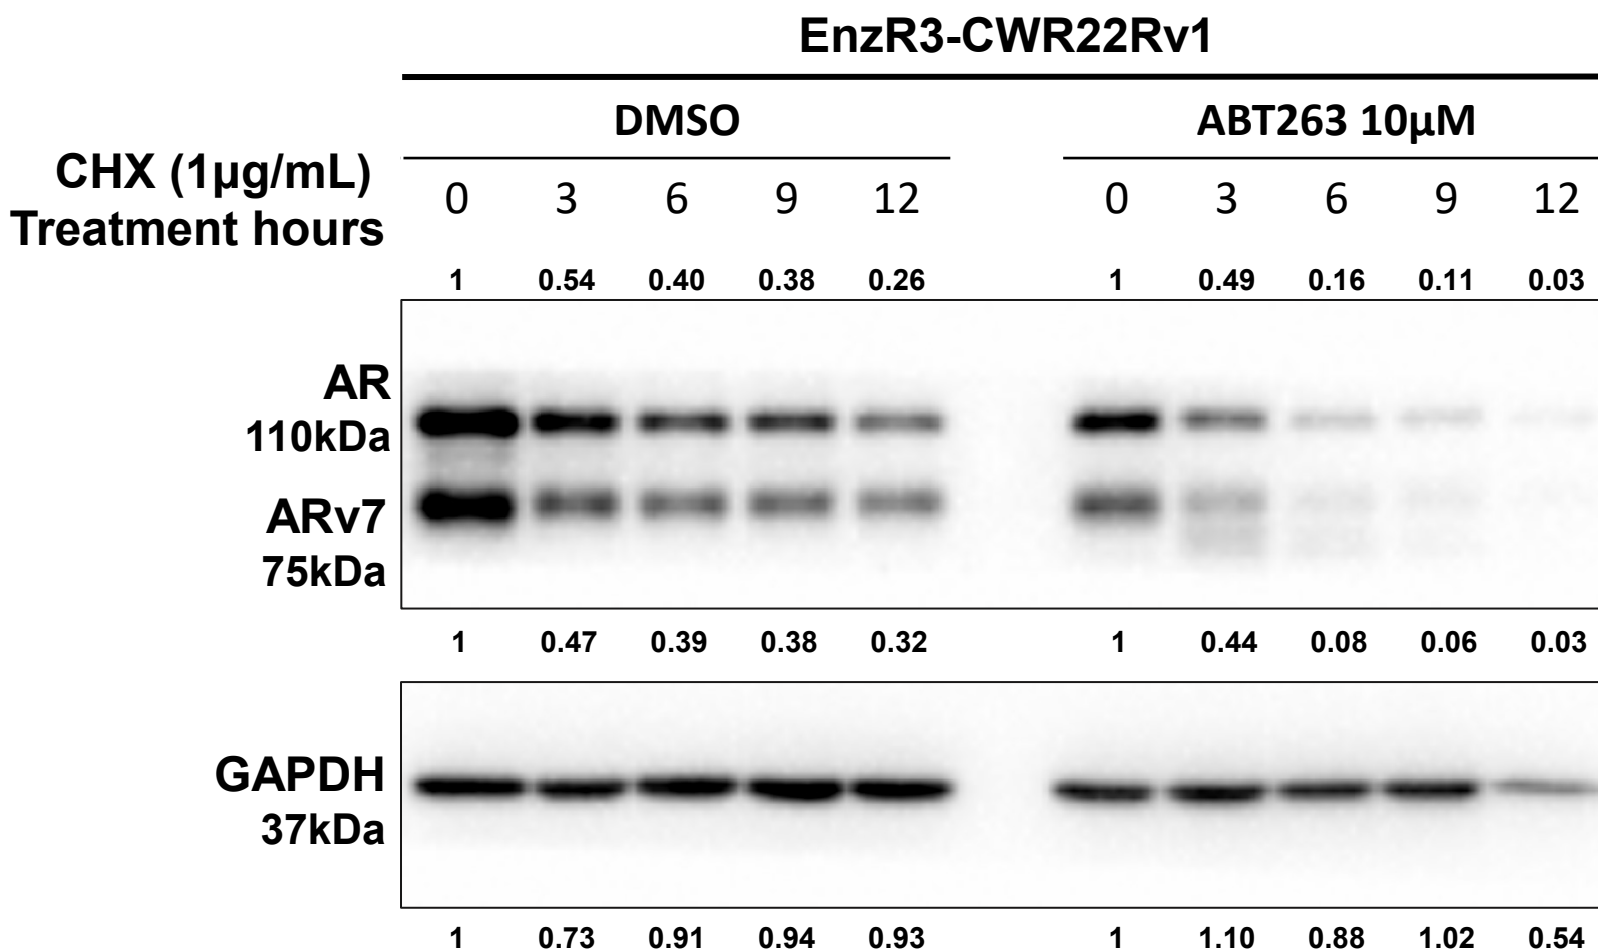

# Figure 2F

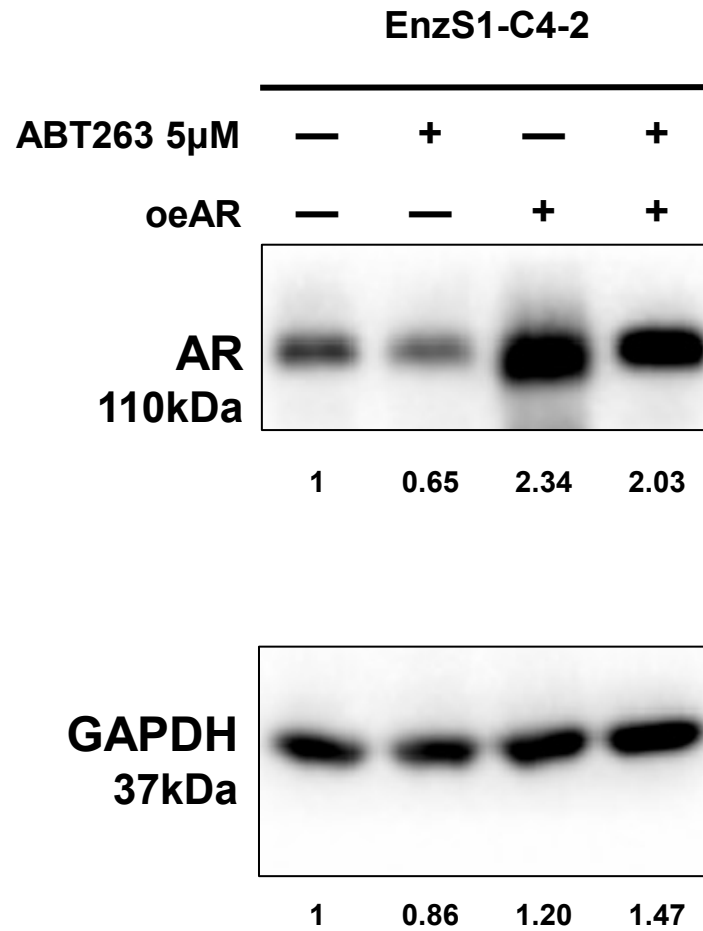



# Figure 2G

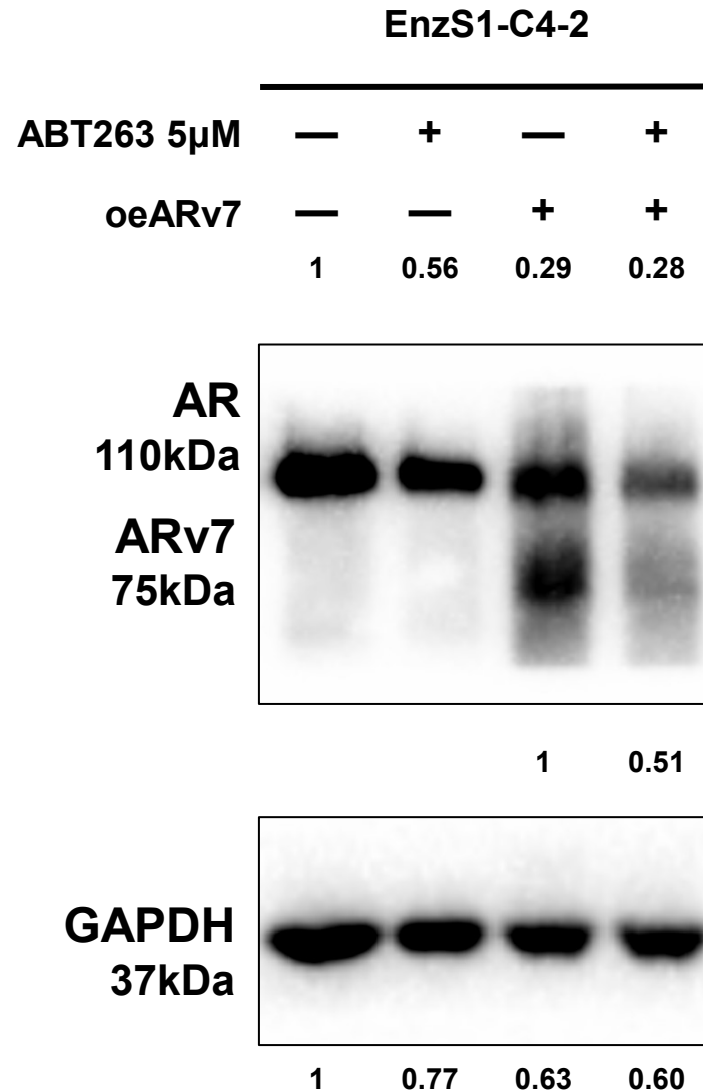

# Figure 2H

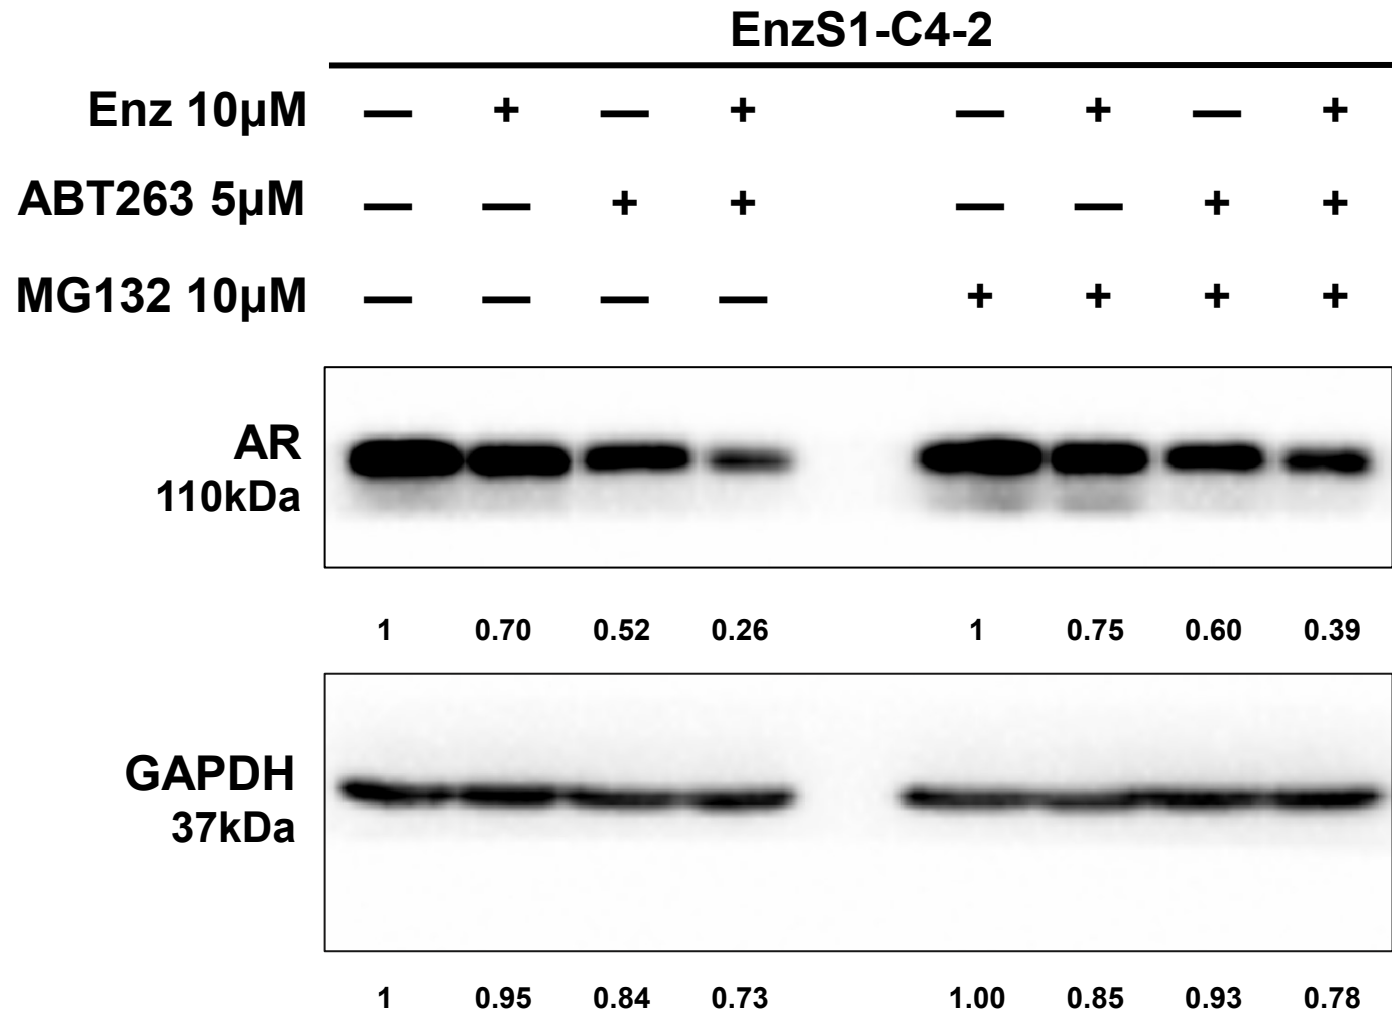

# Figure 2H

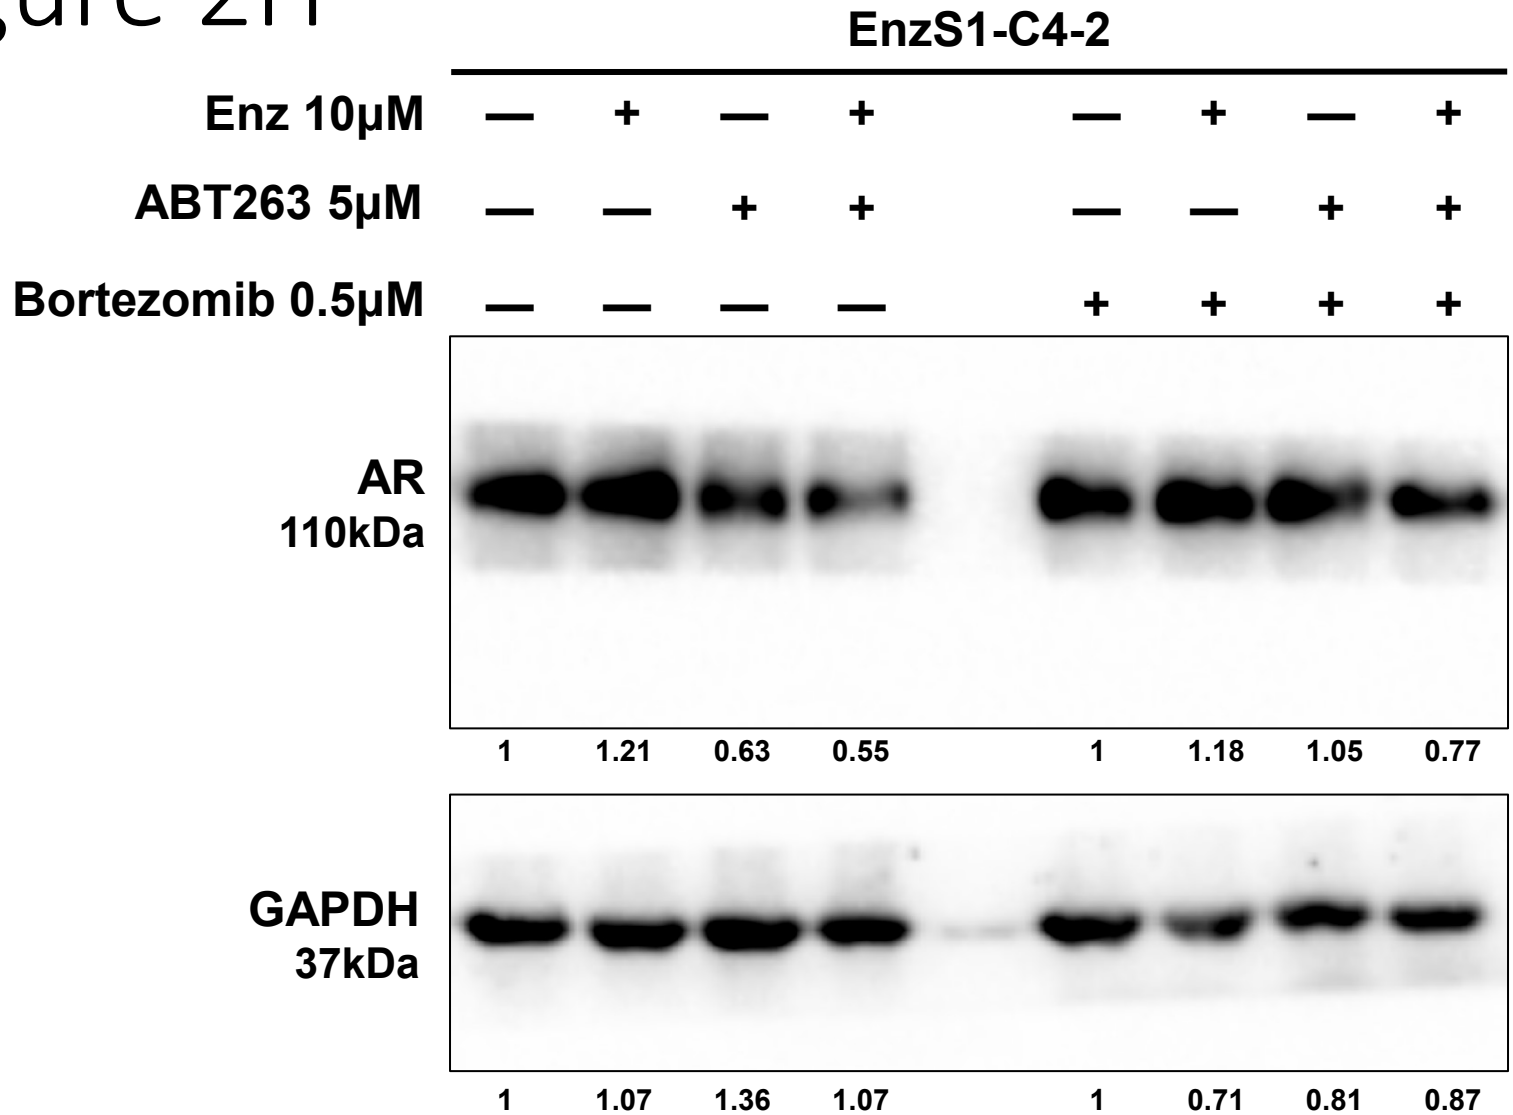

# Figure 2I

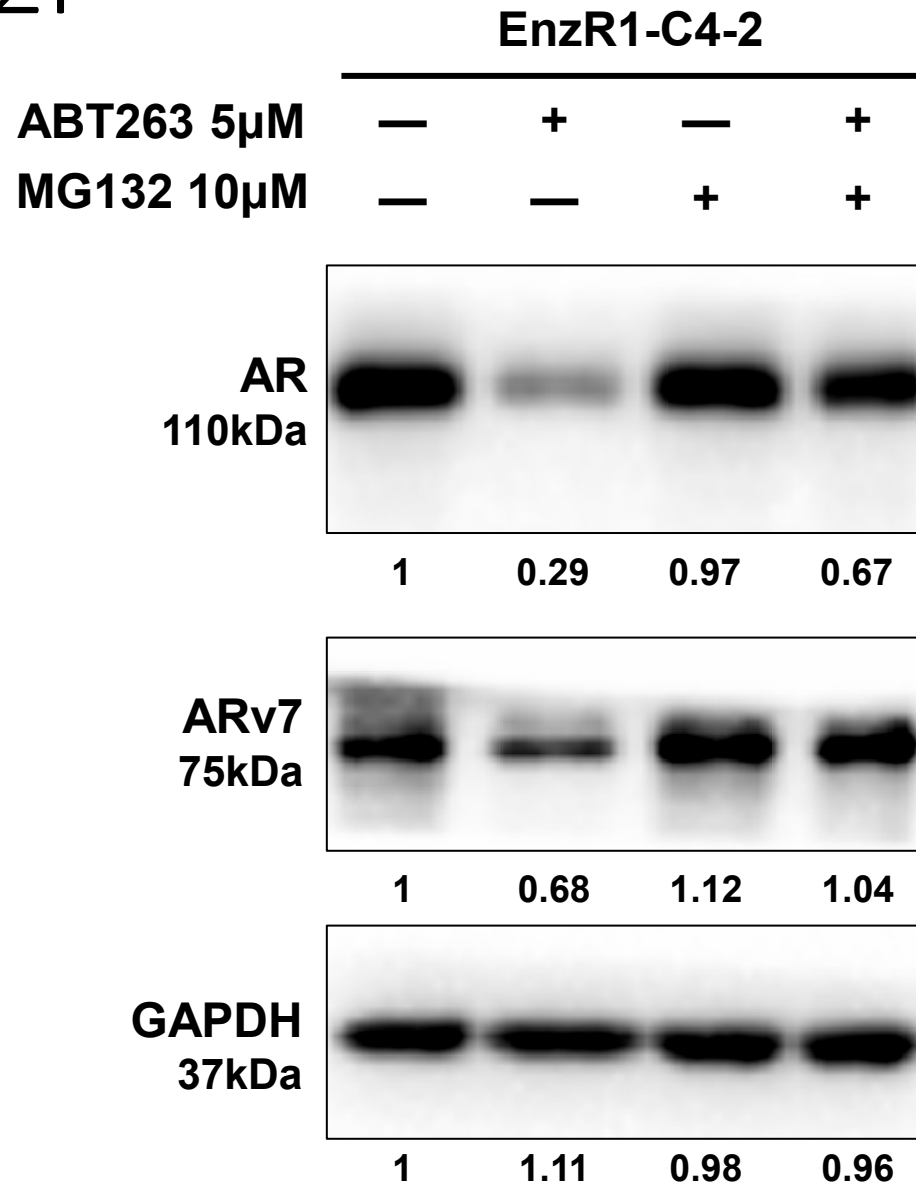

# Figure 2I

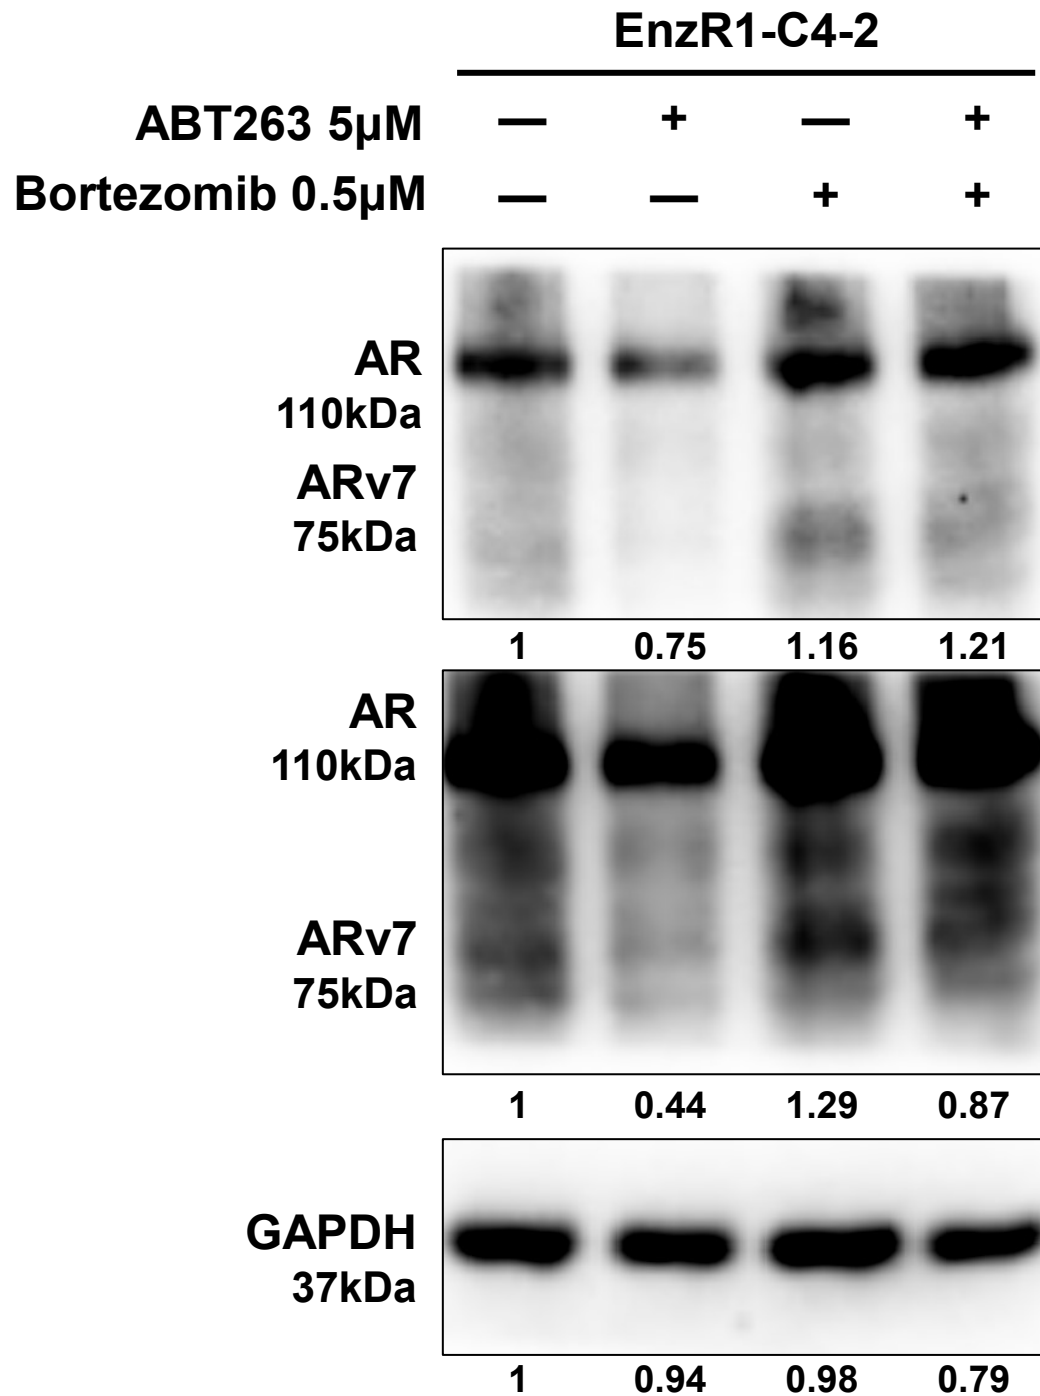

Figure 2J

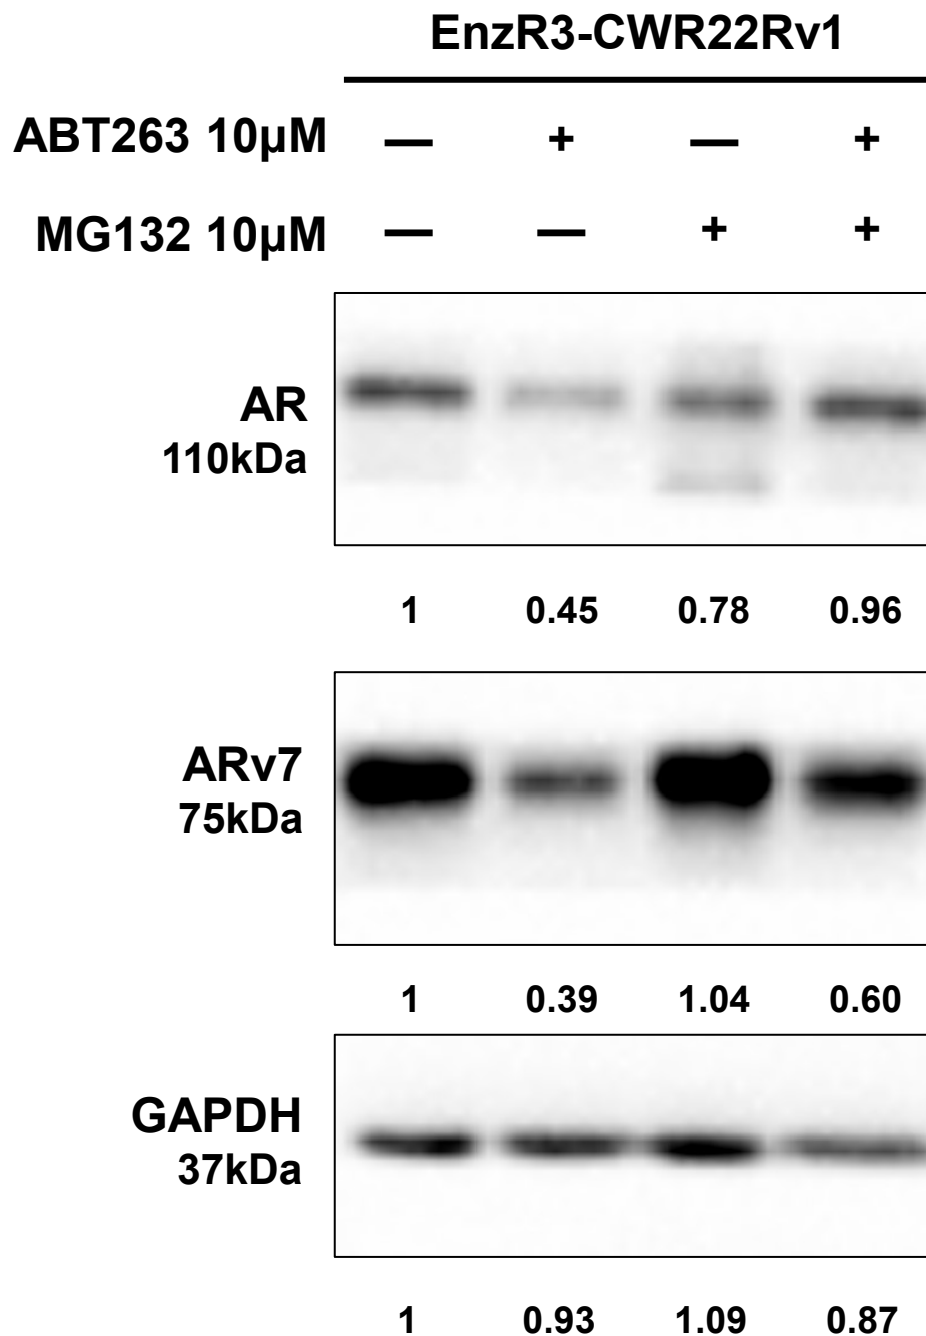

# Figure 2J

|                  | EnzR3-CWR22Rv1 |      |      |      |
|------------------|----------------|------|------|------|
| ABT263 10μM      | —              | +    | —    | +    |
| Bortezomib 0.5μM | —              | —    | +    | +    |
|                  | 1              | 0.47 | 0.57 | 0.59 |

AR  
110kDa

ARv7  
75kDa

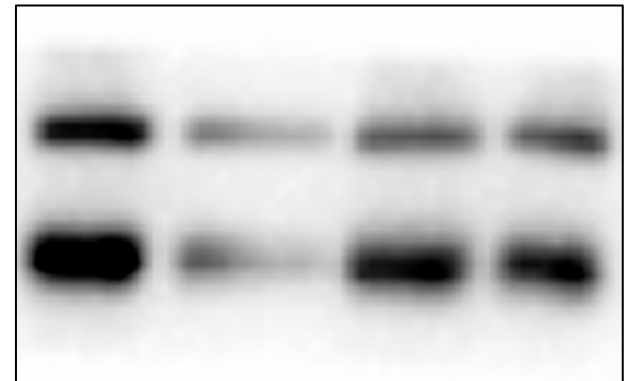

1 0.37 0.74 0.61

GAPDH  
37kDa

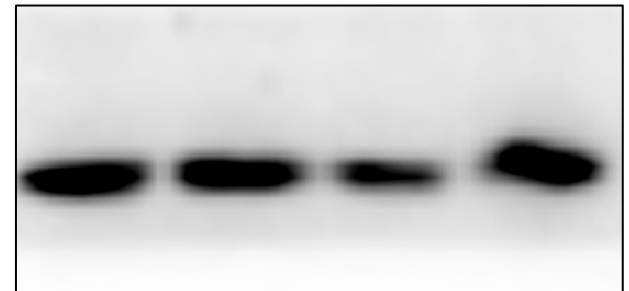

1 1.41 0.67 1.04

Figure 2K

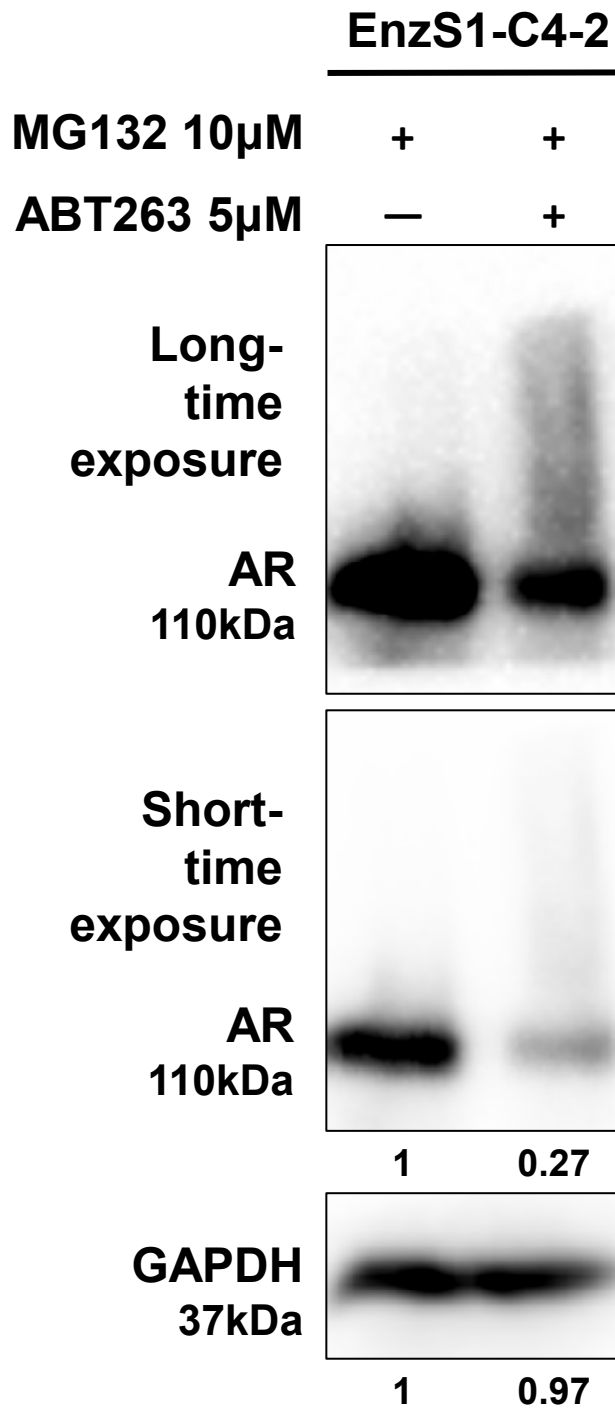



Figure 2L

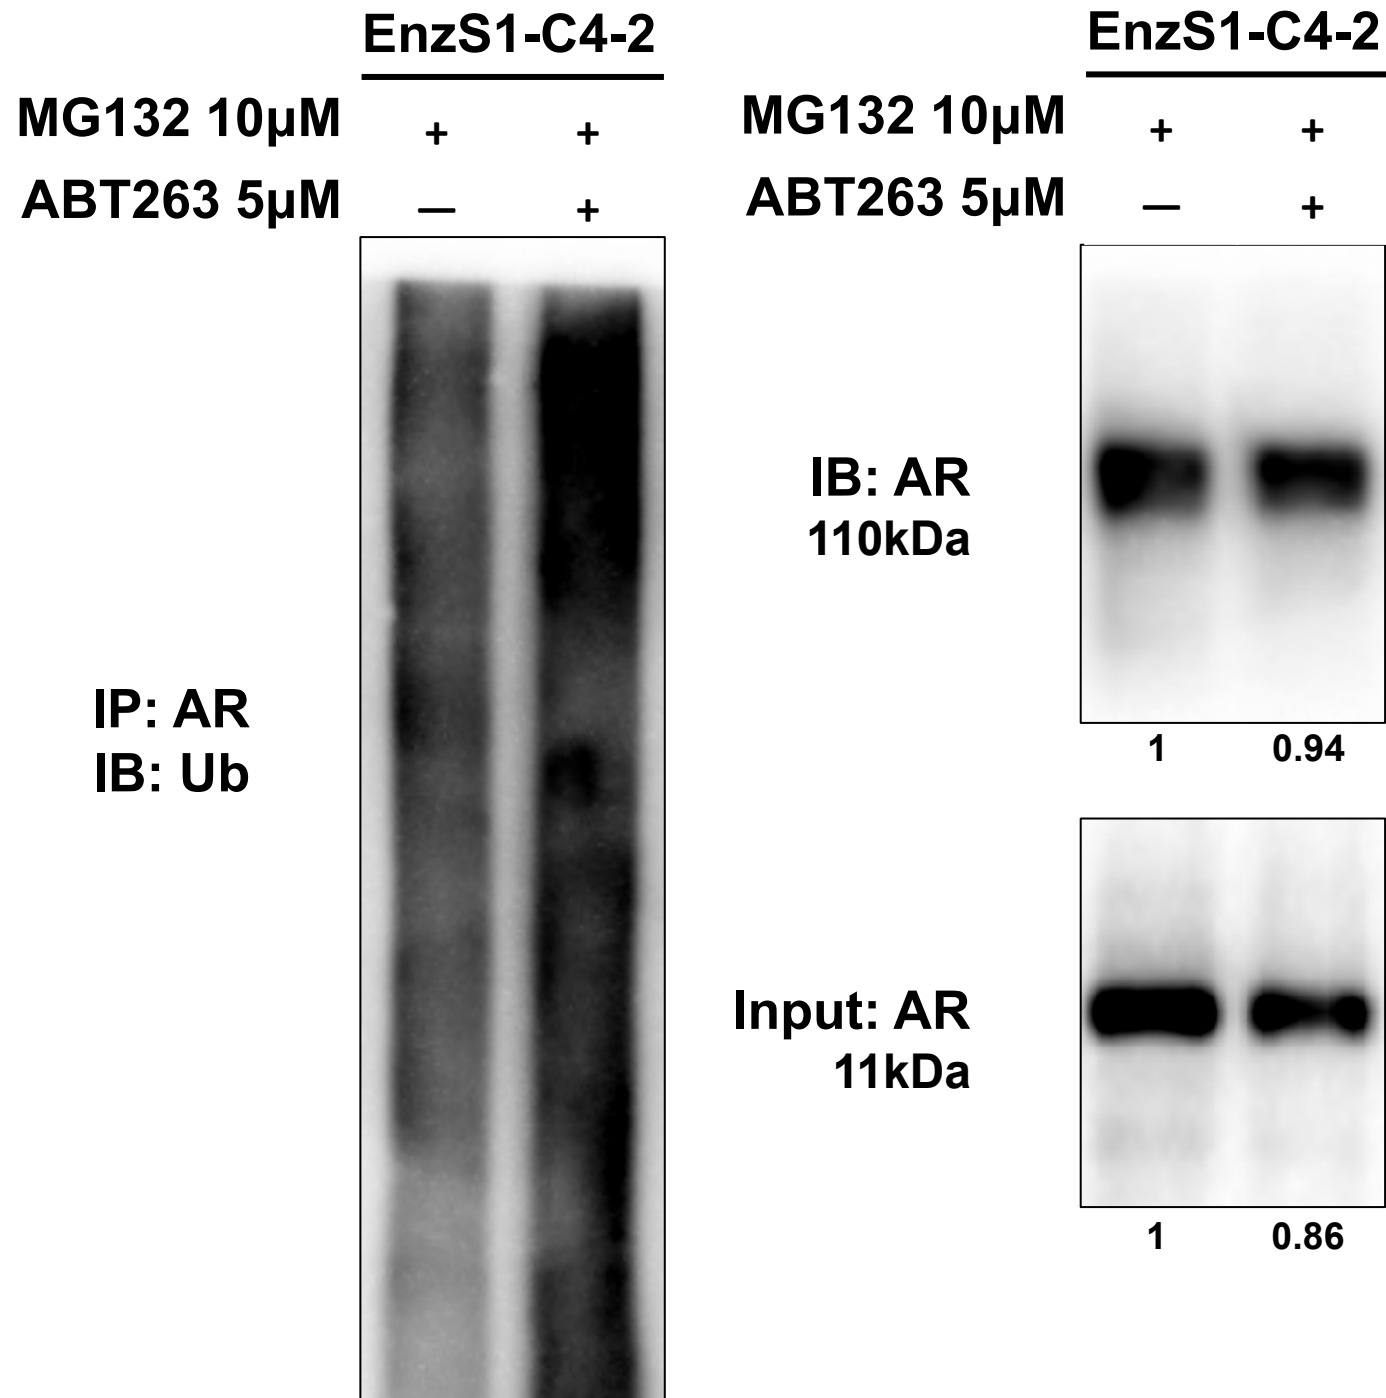

Figure 2M

|            | EnzR1-C4-2 |   |
|------------|------------|---|
| MG132 10μM | +          | + |
| ABT263 5μM | —          | + |

Long-time exposure

AR  
110kDa

ARv7  
75kDa

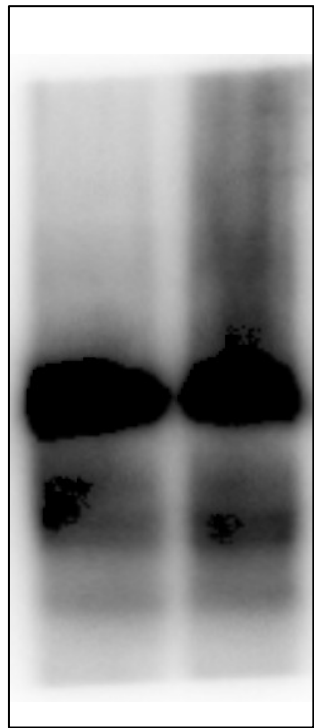

|      |   |      |
|------|---|------|
| AR   | 1 | 0.35 |
| ARv7 | 1 | 1.07 |

|            | EnzR1-C4-2 |   |
|------------|------------|---|
| MG132 10μM | +          | + |
| ABT263 5μM | —          | + |

Short-time exposure

AR  
110kDa

ARv7  
75kDa

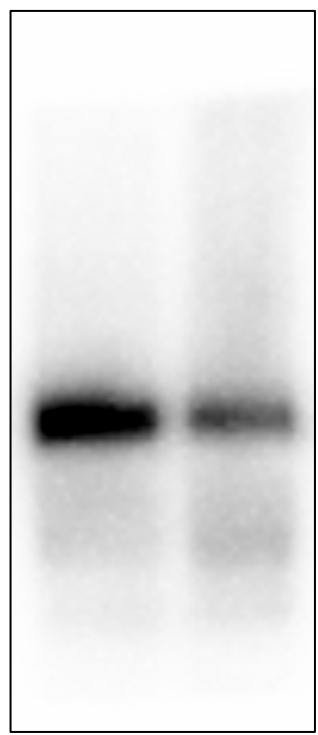

GAPDH  
37kDa

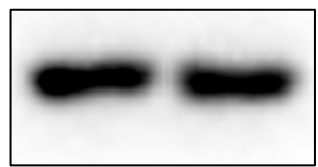

|   |      |
|---|------|
| 1 | 1.12 |
|---|------|

# Figure 2N

MG132 10μM  
ABT263 5μM

EnzR1-C4-2

+

+

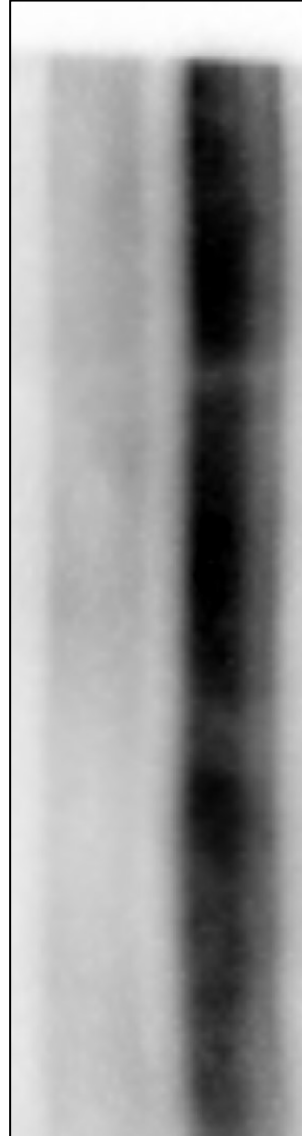

MG132 10μM  
ABT263 5μM

EnzR1-C4-2

+

+

—

+

IB: AR  
110kDa

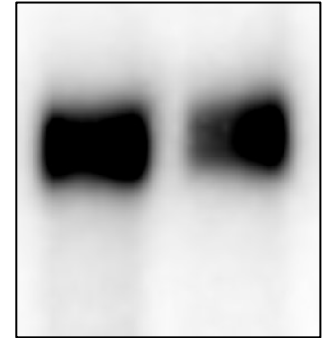

1

0.72

1

0.68

Input: AR  
110kDa

ARv7  
75kDa

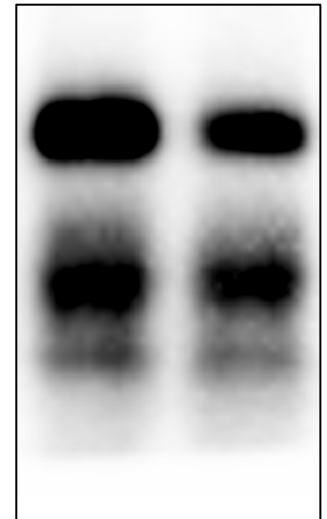

# Figure 4A

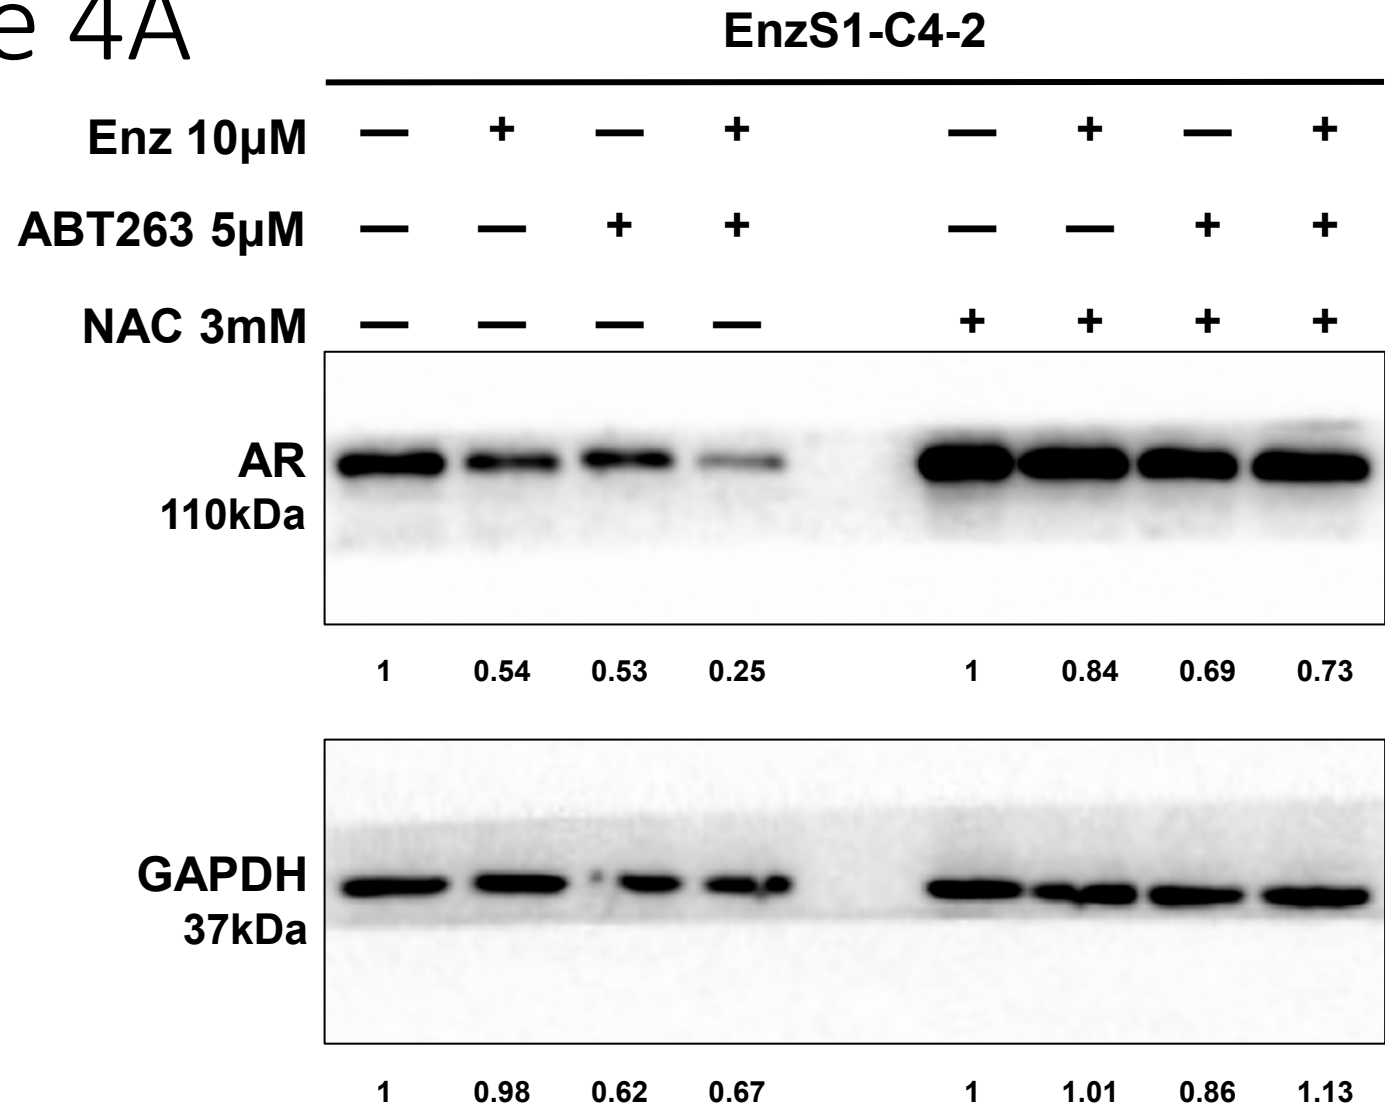

Figure 4B

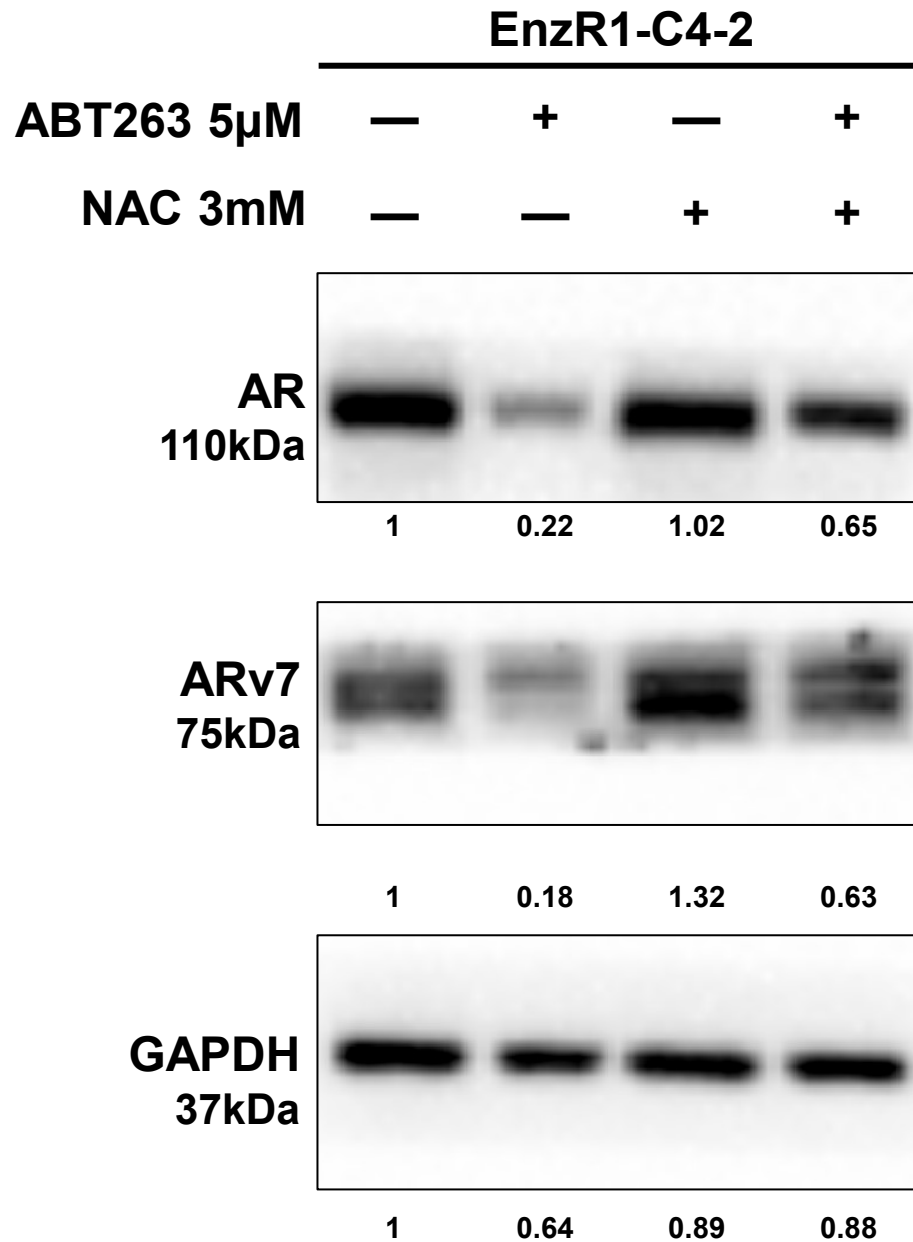

Figure 4C

|             | EnzR3-CWR22Rv1 |      |      |      |
|-------------|----------------|------|------|------|
| ABT263 10μM | —              | +    | —    | +    |
| NAC 3mM     | —              | —    | +    | +    |
|             | 1              | 0.48 | 1.02 | 0.85 |

AR  
110kDa

ARv7  
75kDa

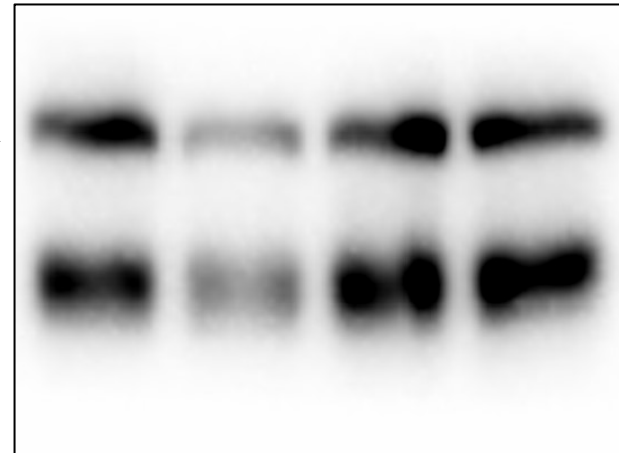

1 0.58 1.32 1.19

GAPDH  
37kDa

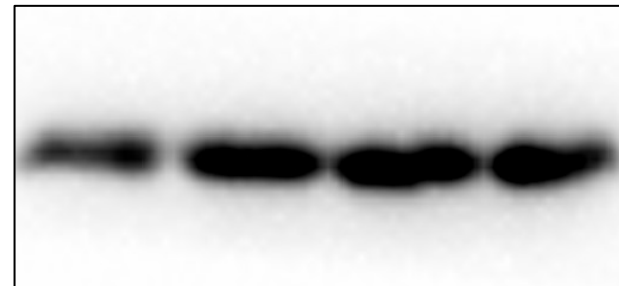

1 1.66 1.59 1.45

Figure 4D

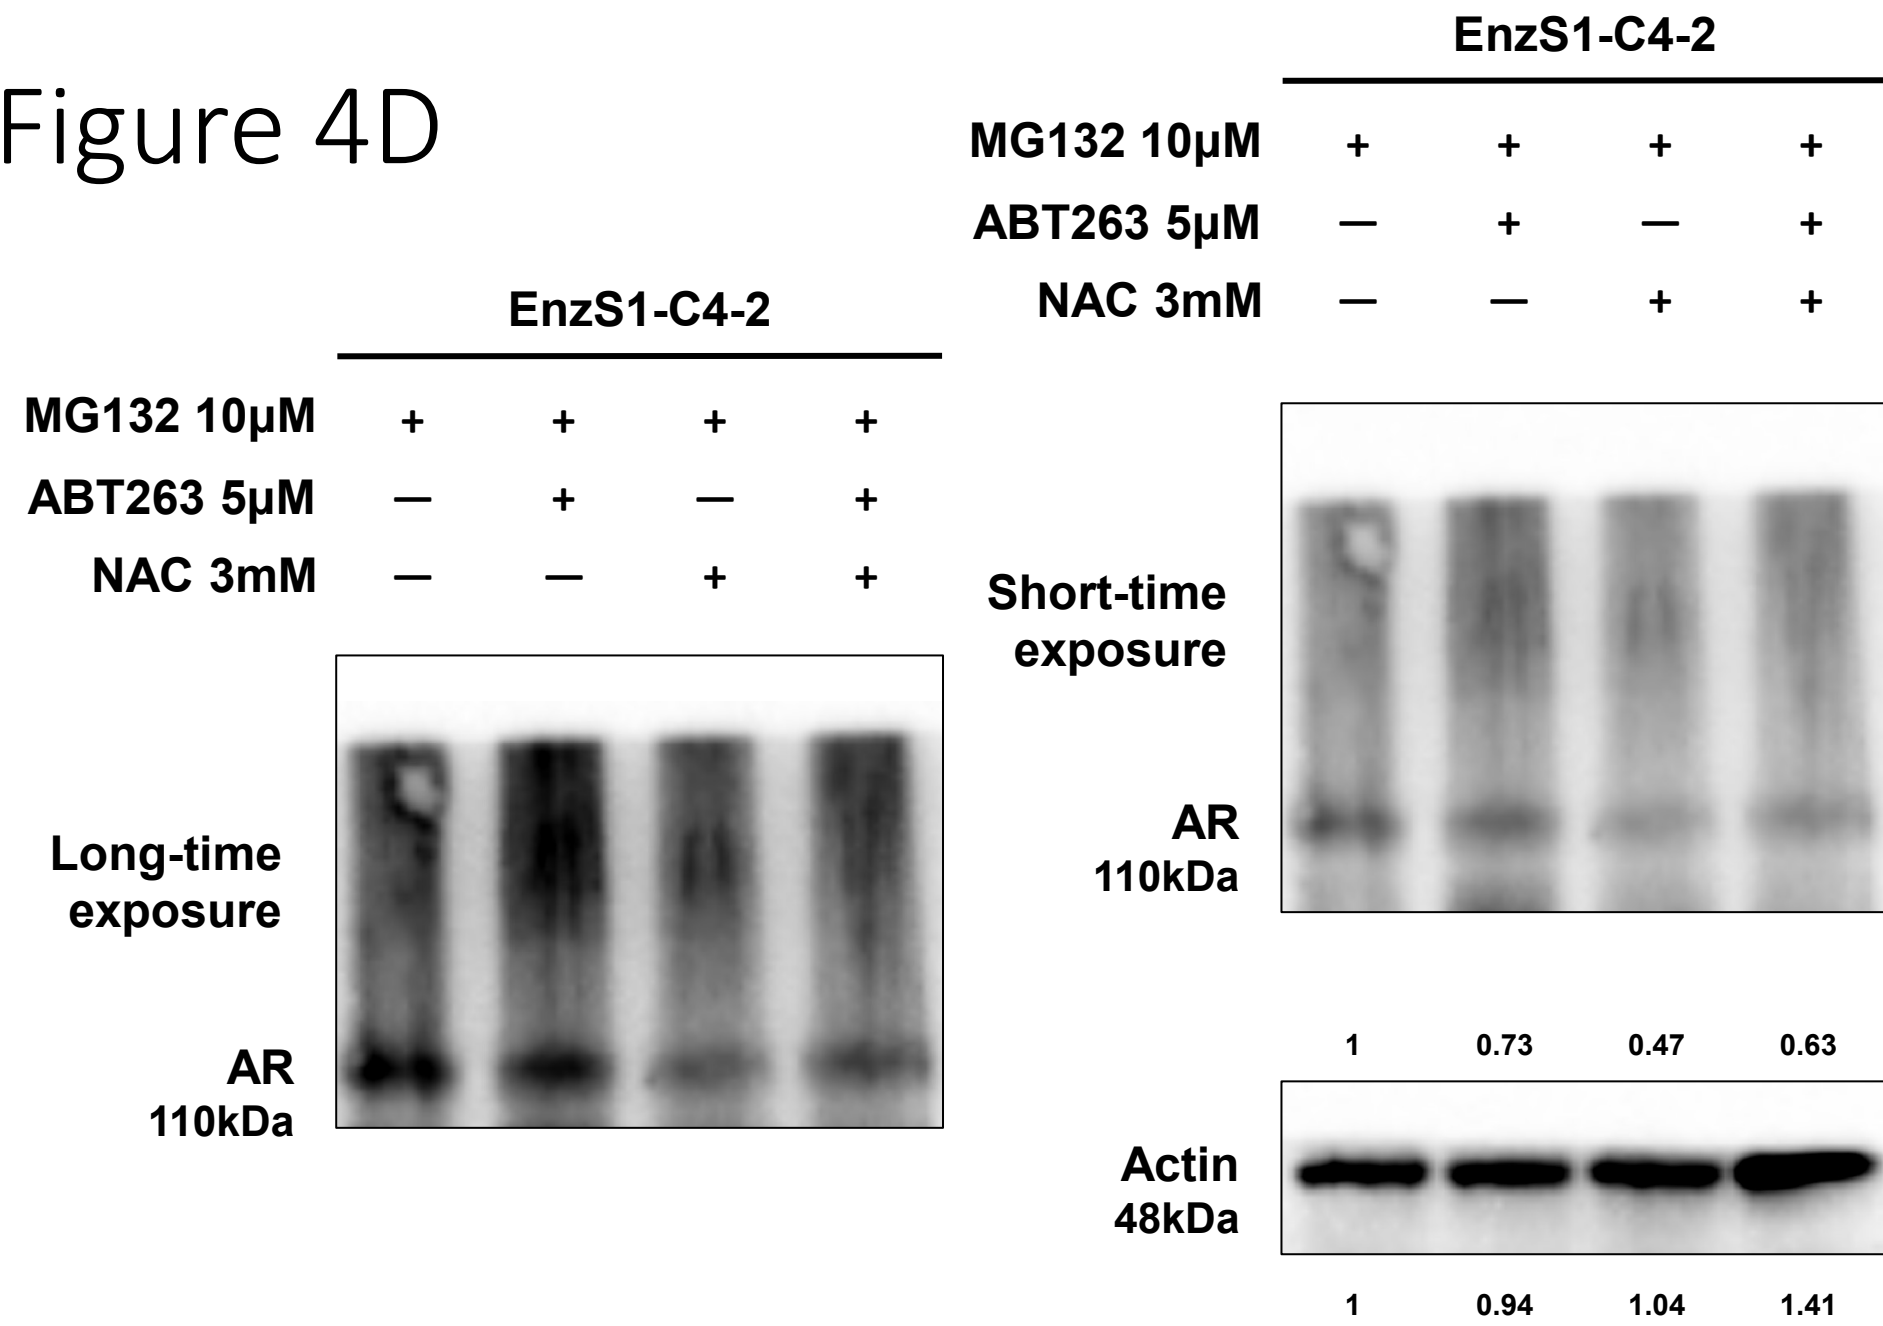

Figure 4E

|            | EnzS1-C4-2 |   |   |   |
|------------|------------|---|---|---|
| MG132 10μM | +          | + | + | + |
| ABT263 5μM | —          | + | — | + |
| NAC 3mM    | —          | — | + | + |

MG132 10μM  
ABT263 5μM  
NAC 3mM

|            | EnzS1-C4-2 |   |   |   |
|------------|------------|---|---|---|
| MG132 10μM | +          | + | + | + |
| ABT263 5μM | —          | + | — | + |
| NAC 3mM    | —          | — | + | + |

IP: AR  
IB: Ub

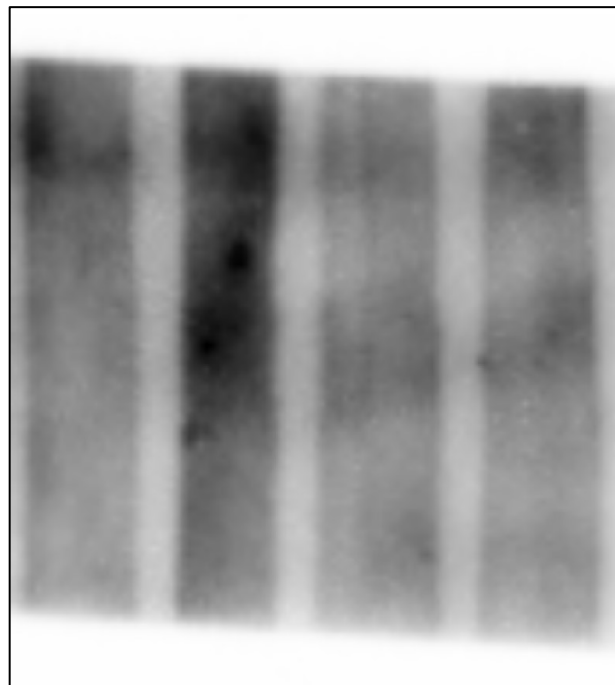

IB: AR  
110kDa

Input: AR  
110kDa

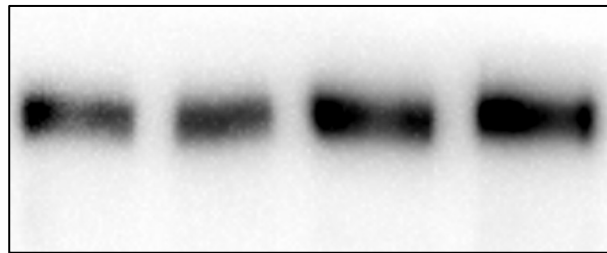

1      0.86      1.09      1.12

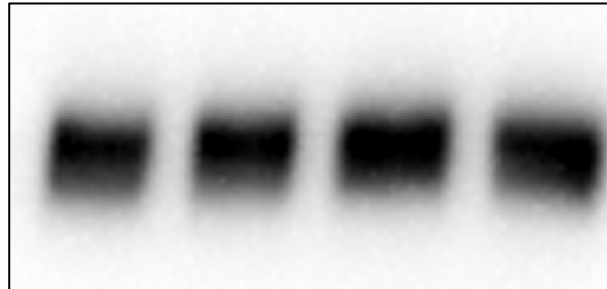

1      0.99      1.12      0.97



Figure 4F

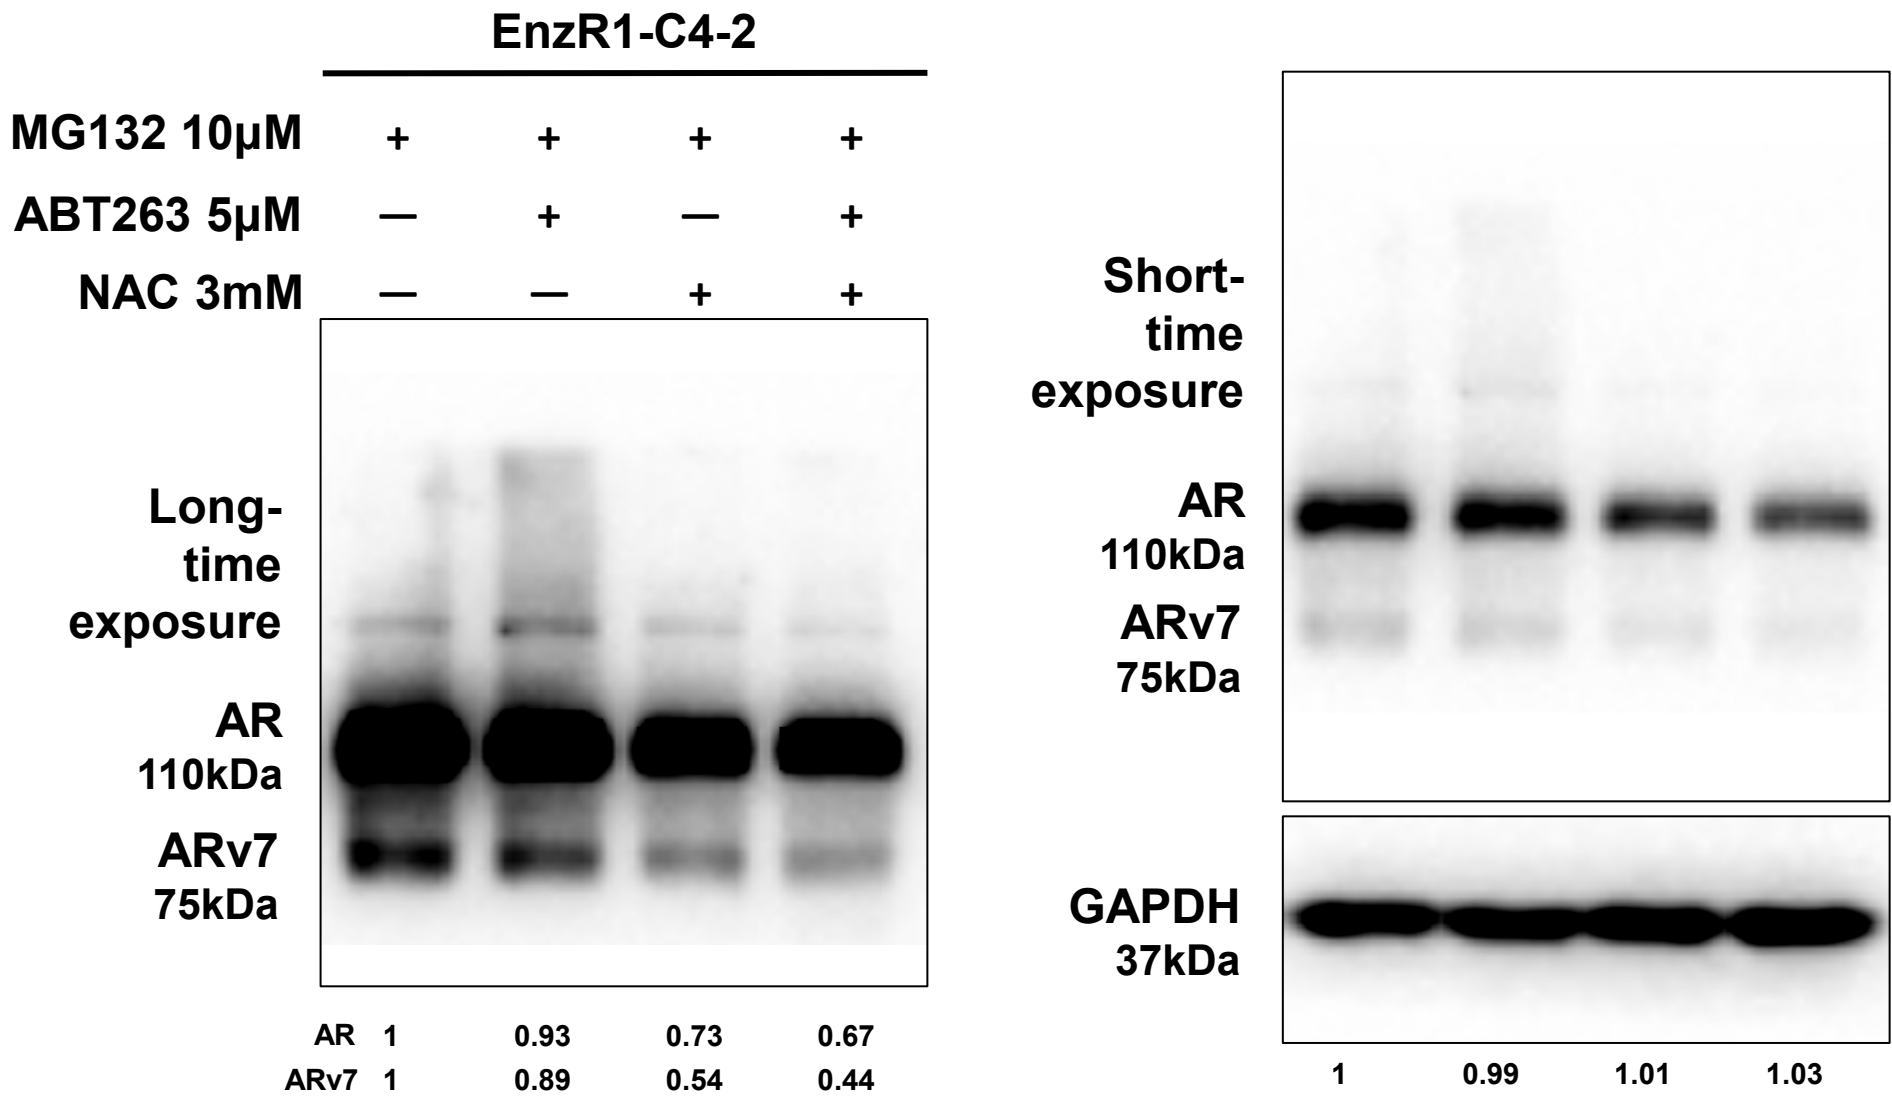

Figure 4G

|            | EnzR1-C4-2 |   |   |   |
|------------|------------|---|---|---|
| MG132 10μM | +          | + | + | + |
| ABT263 5μM | —          | + | — | + |
| NAC 3mM    | —          | — | + | + |

IP: AR  
IB: Ub

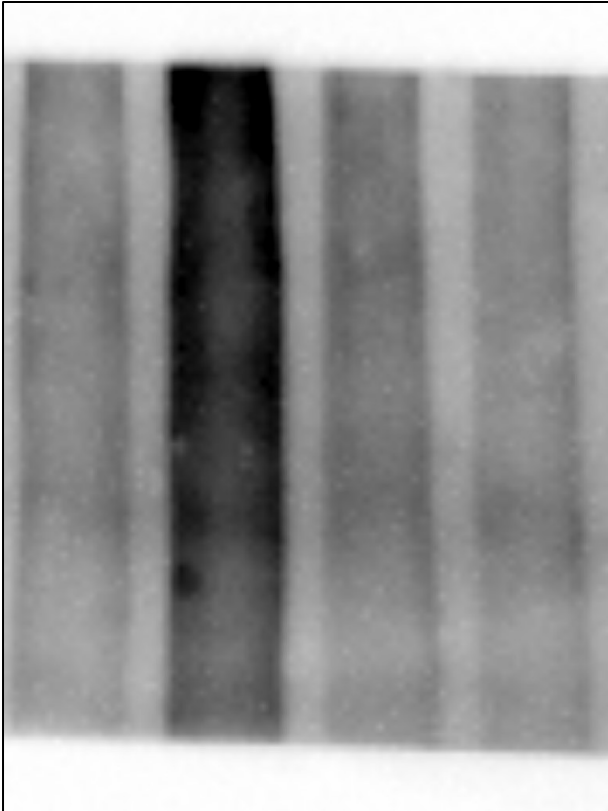

IB: AR  
110kDa

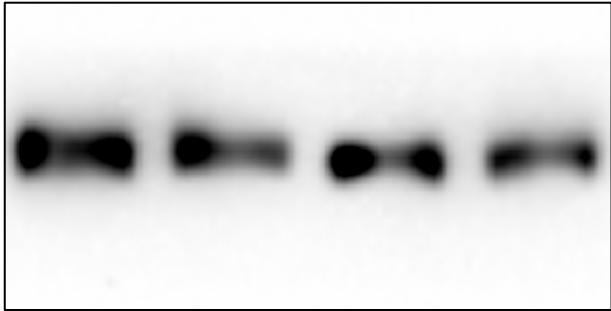

|   |      |      |      |
|---|------|------|------|
| 1 | 0.76 | 0.86 | 0.64 |
| 1 | 0.90 | 1.01 | 0.98 |

Input: AR  
110kDa

ARv7  
75kDa

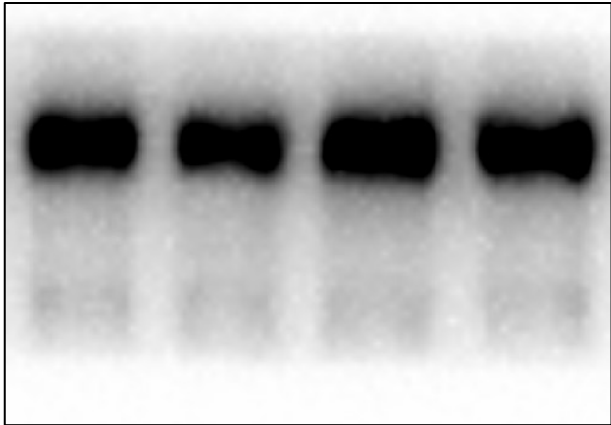

Figure 5A

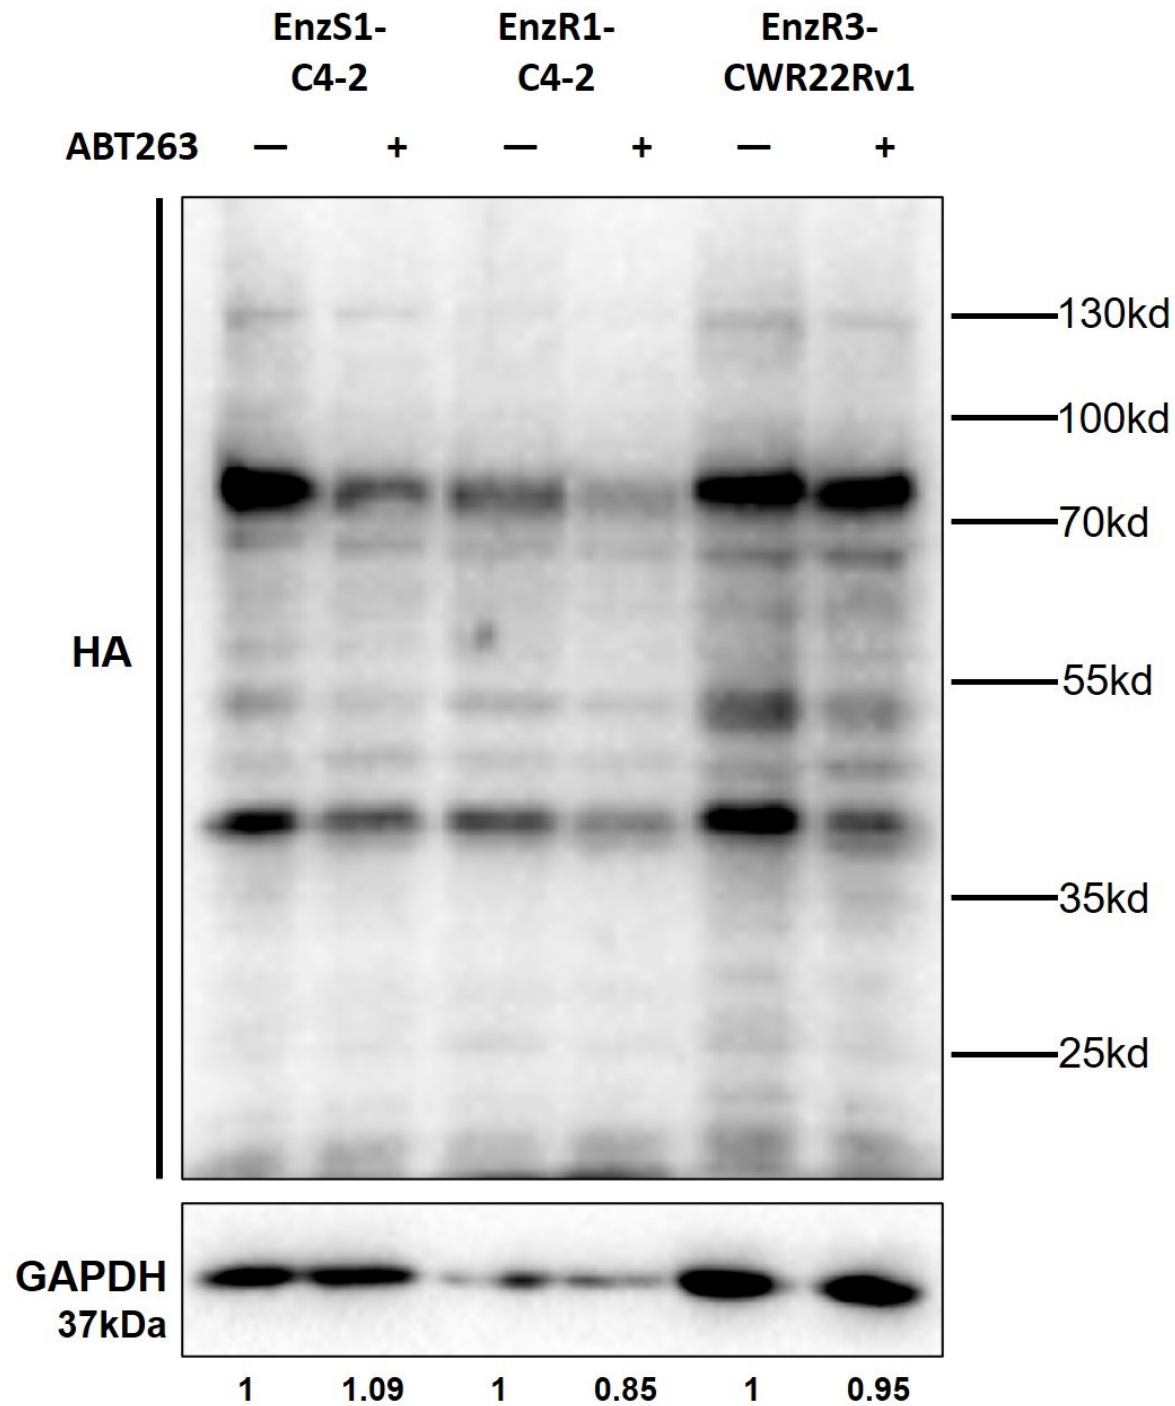

# Figure 5B

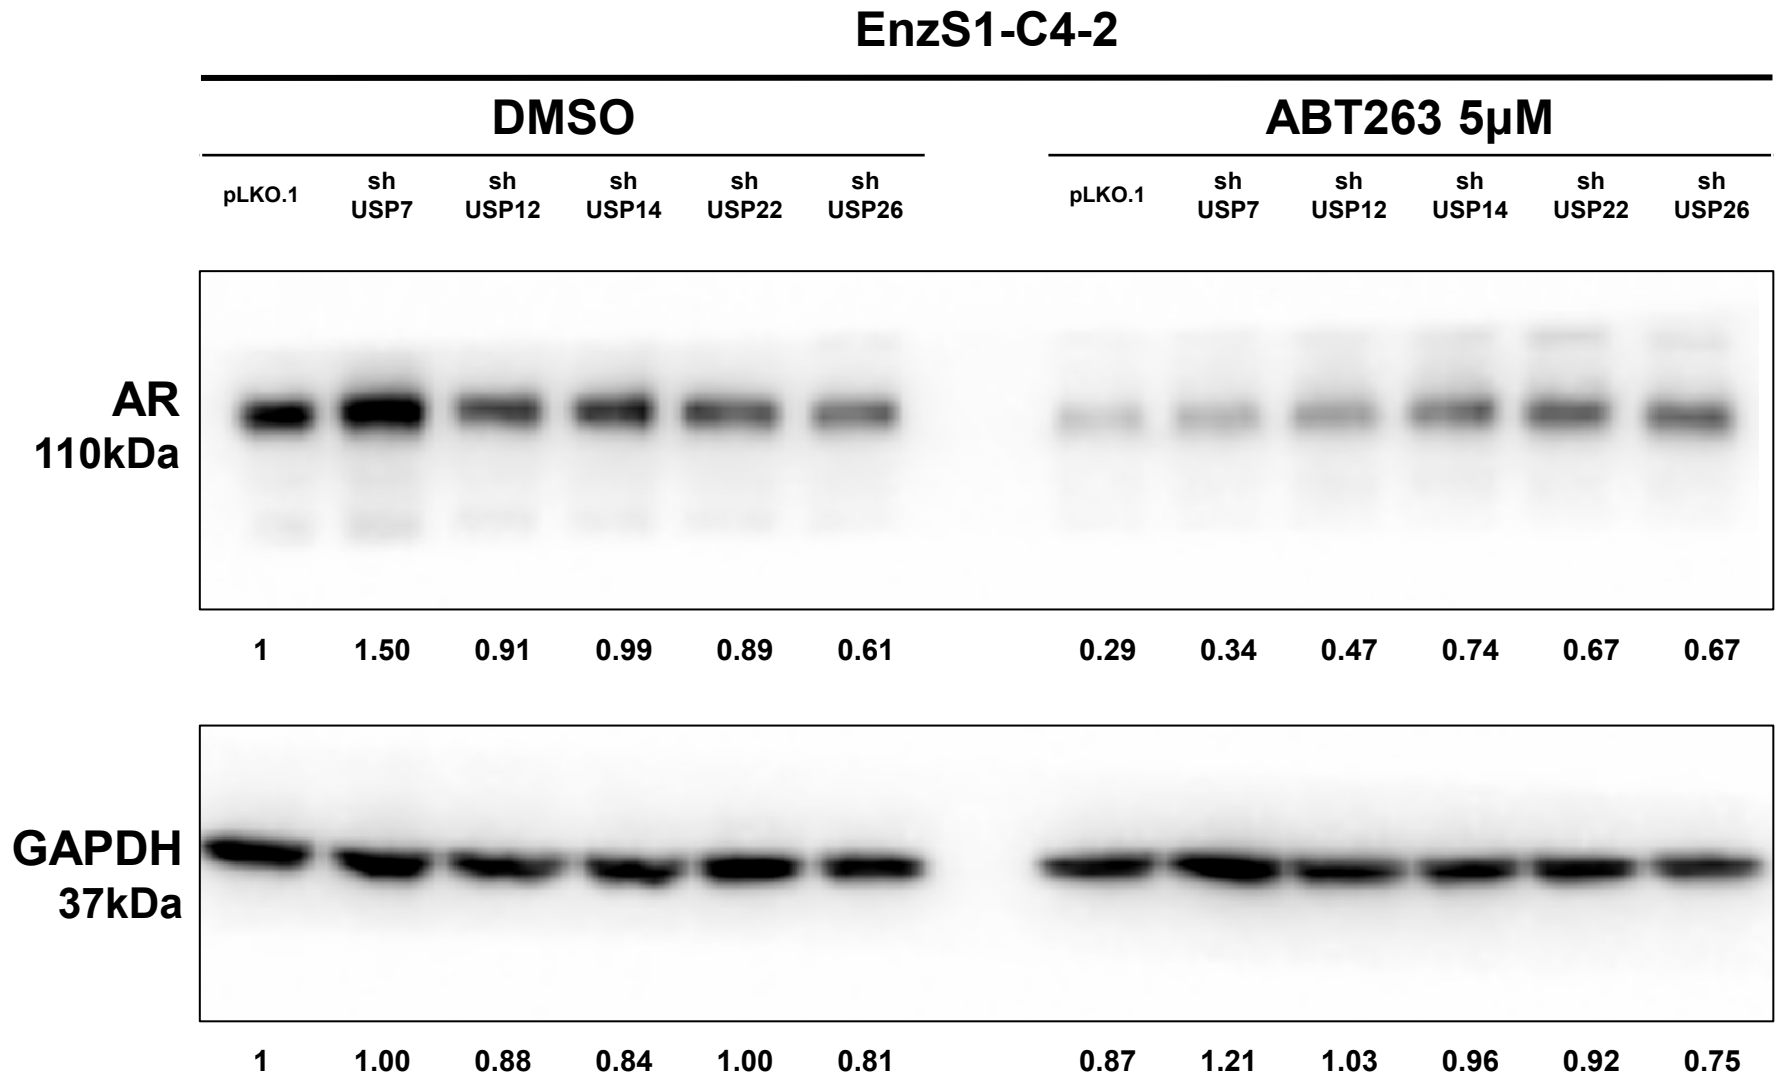

# Figure 5C

EnzR1-C4-2

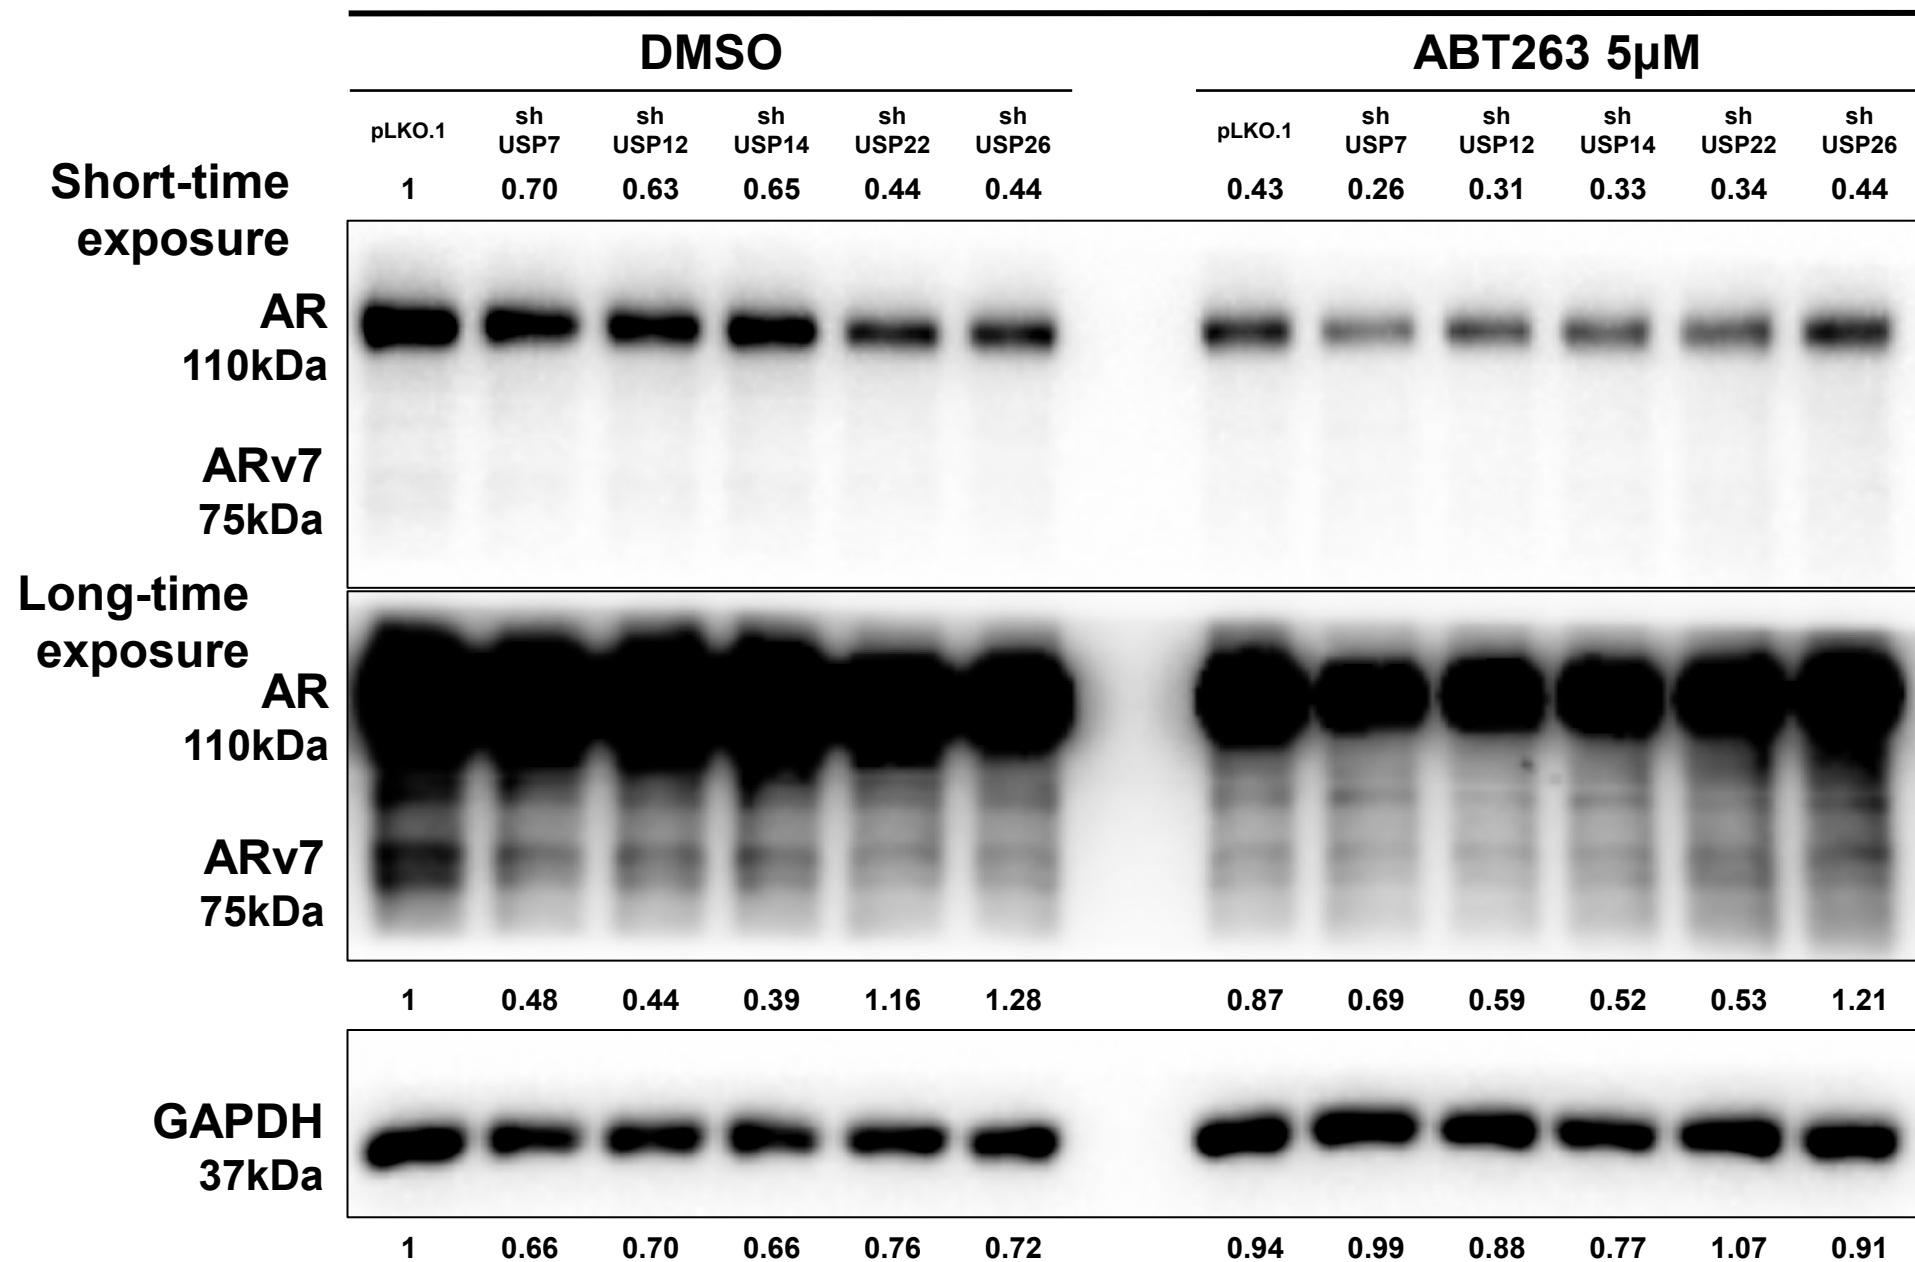

# Figure 5D

## EnzR3-CWR22Rv1

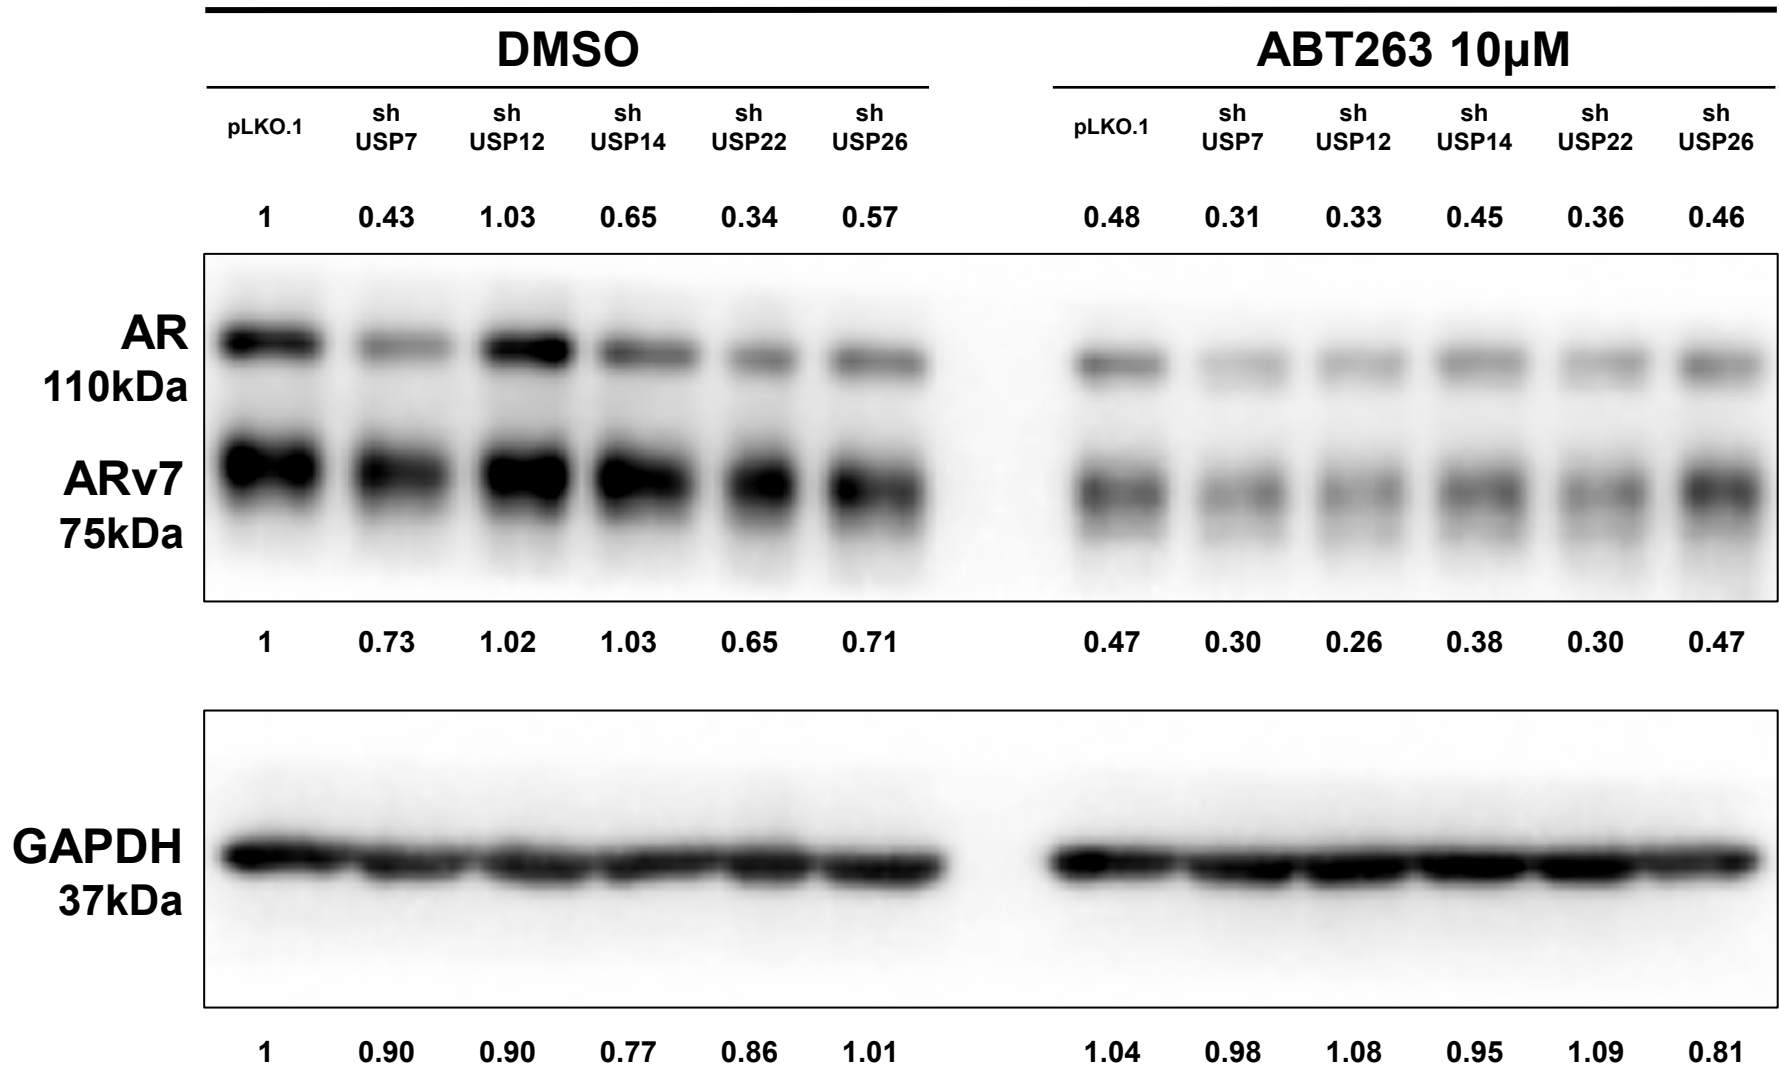

# Figure 5E

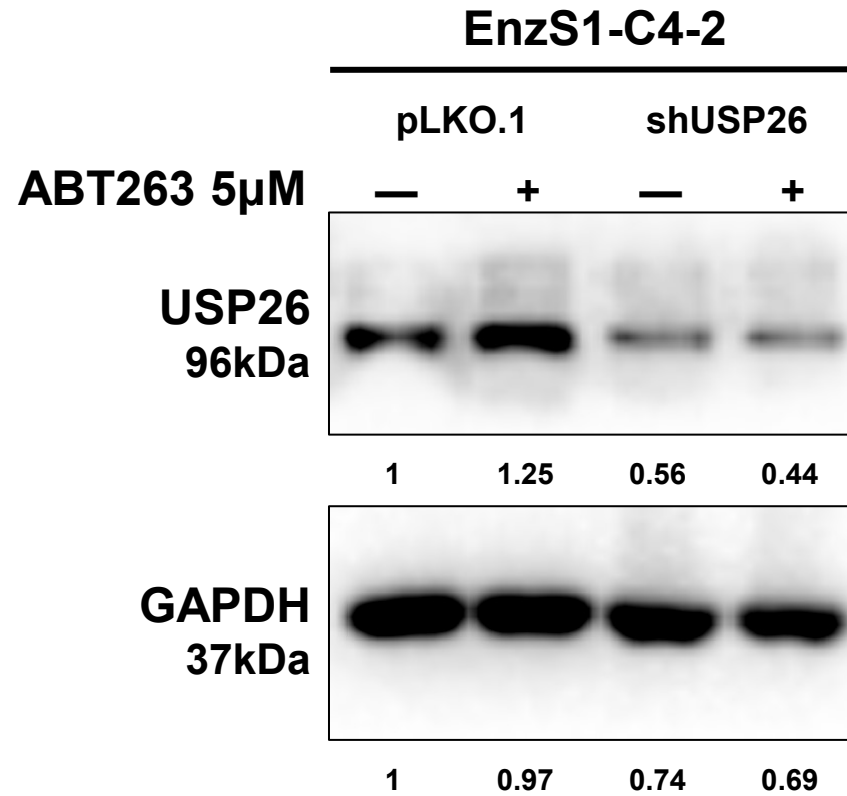

# Figure 5F

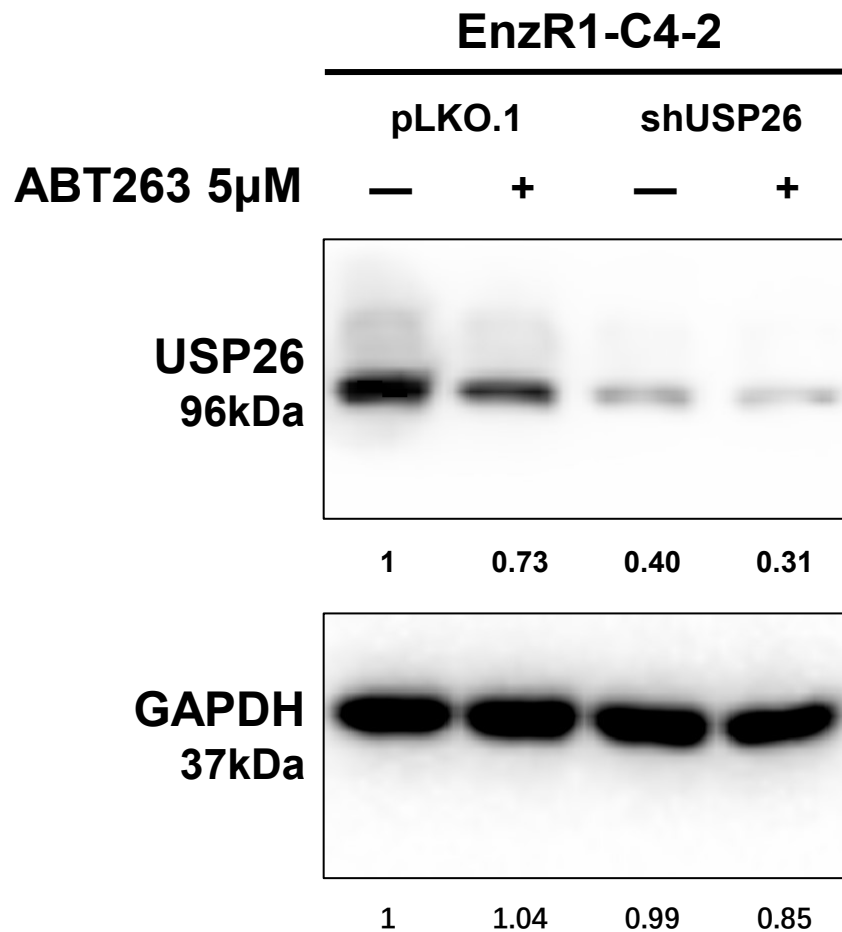



# Figure 5G

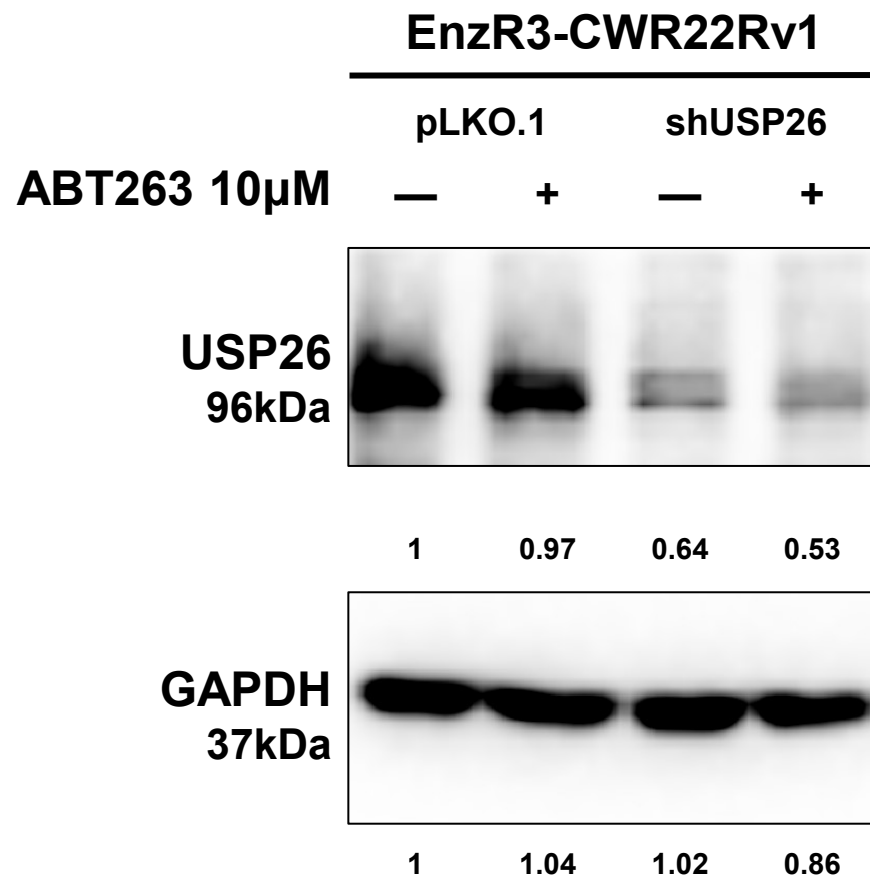

# Figure 6A

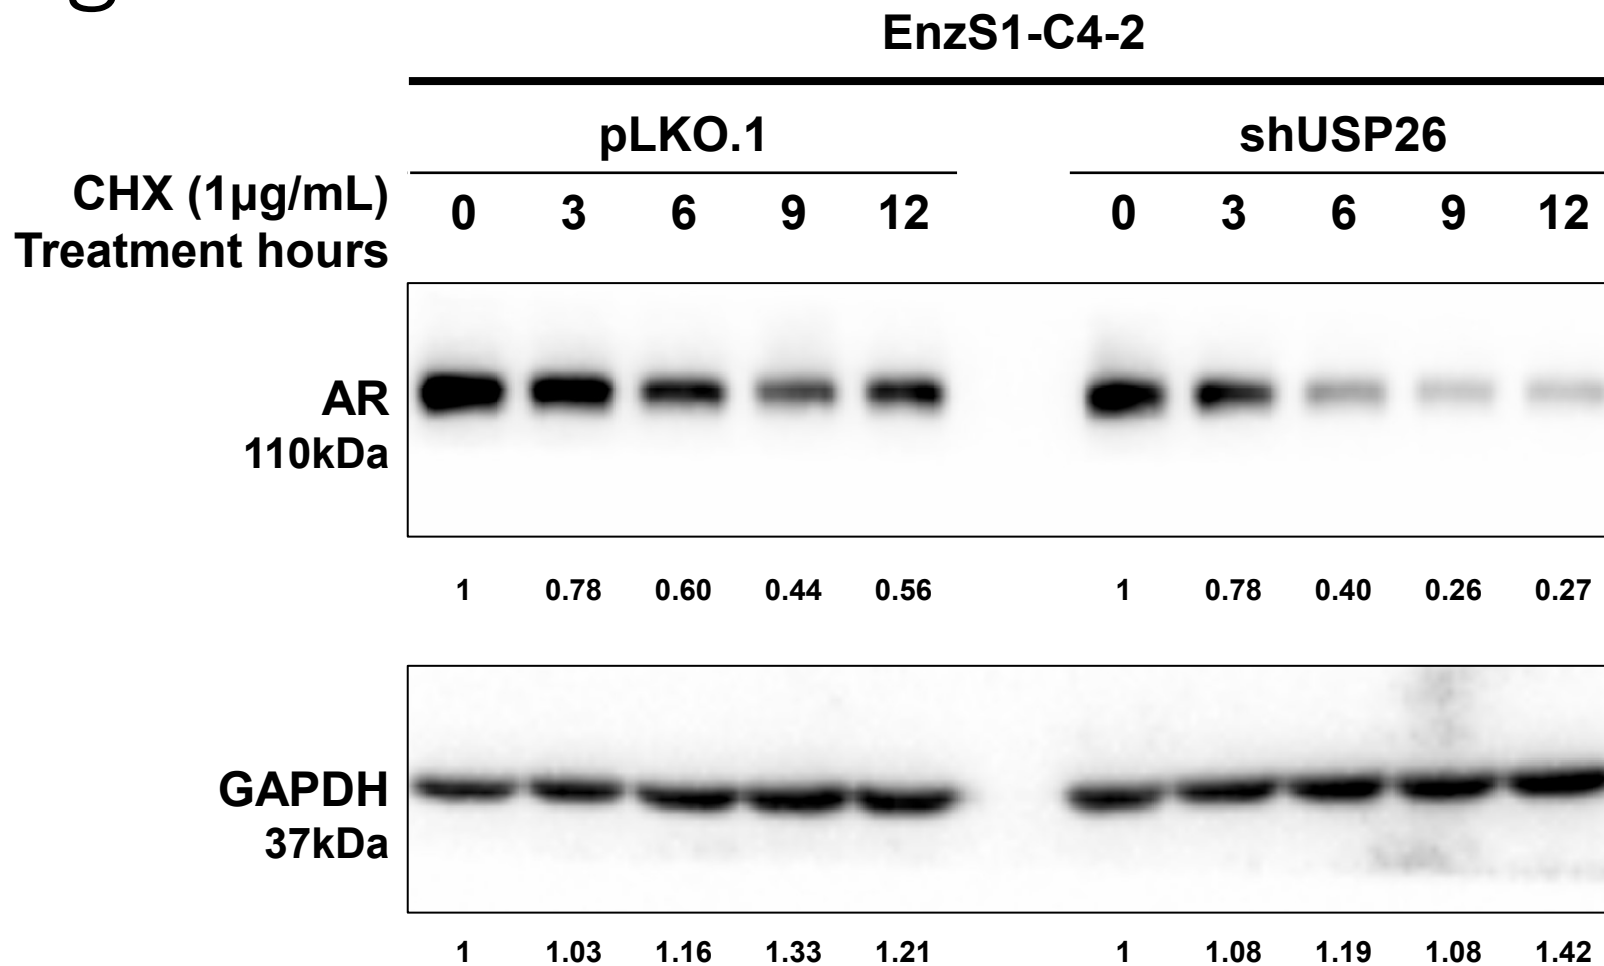

# Figure 6B

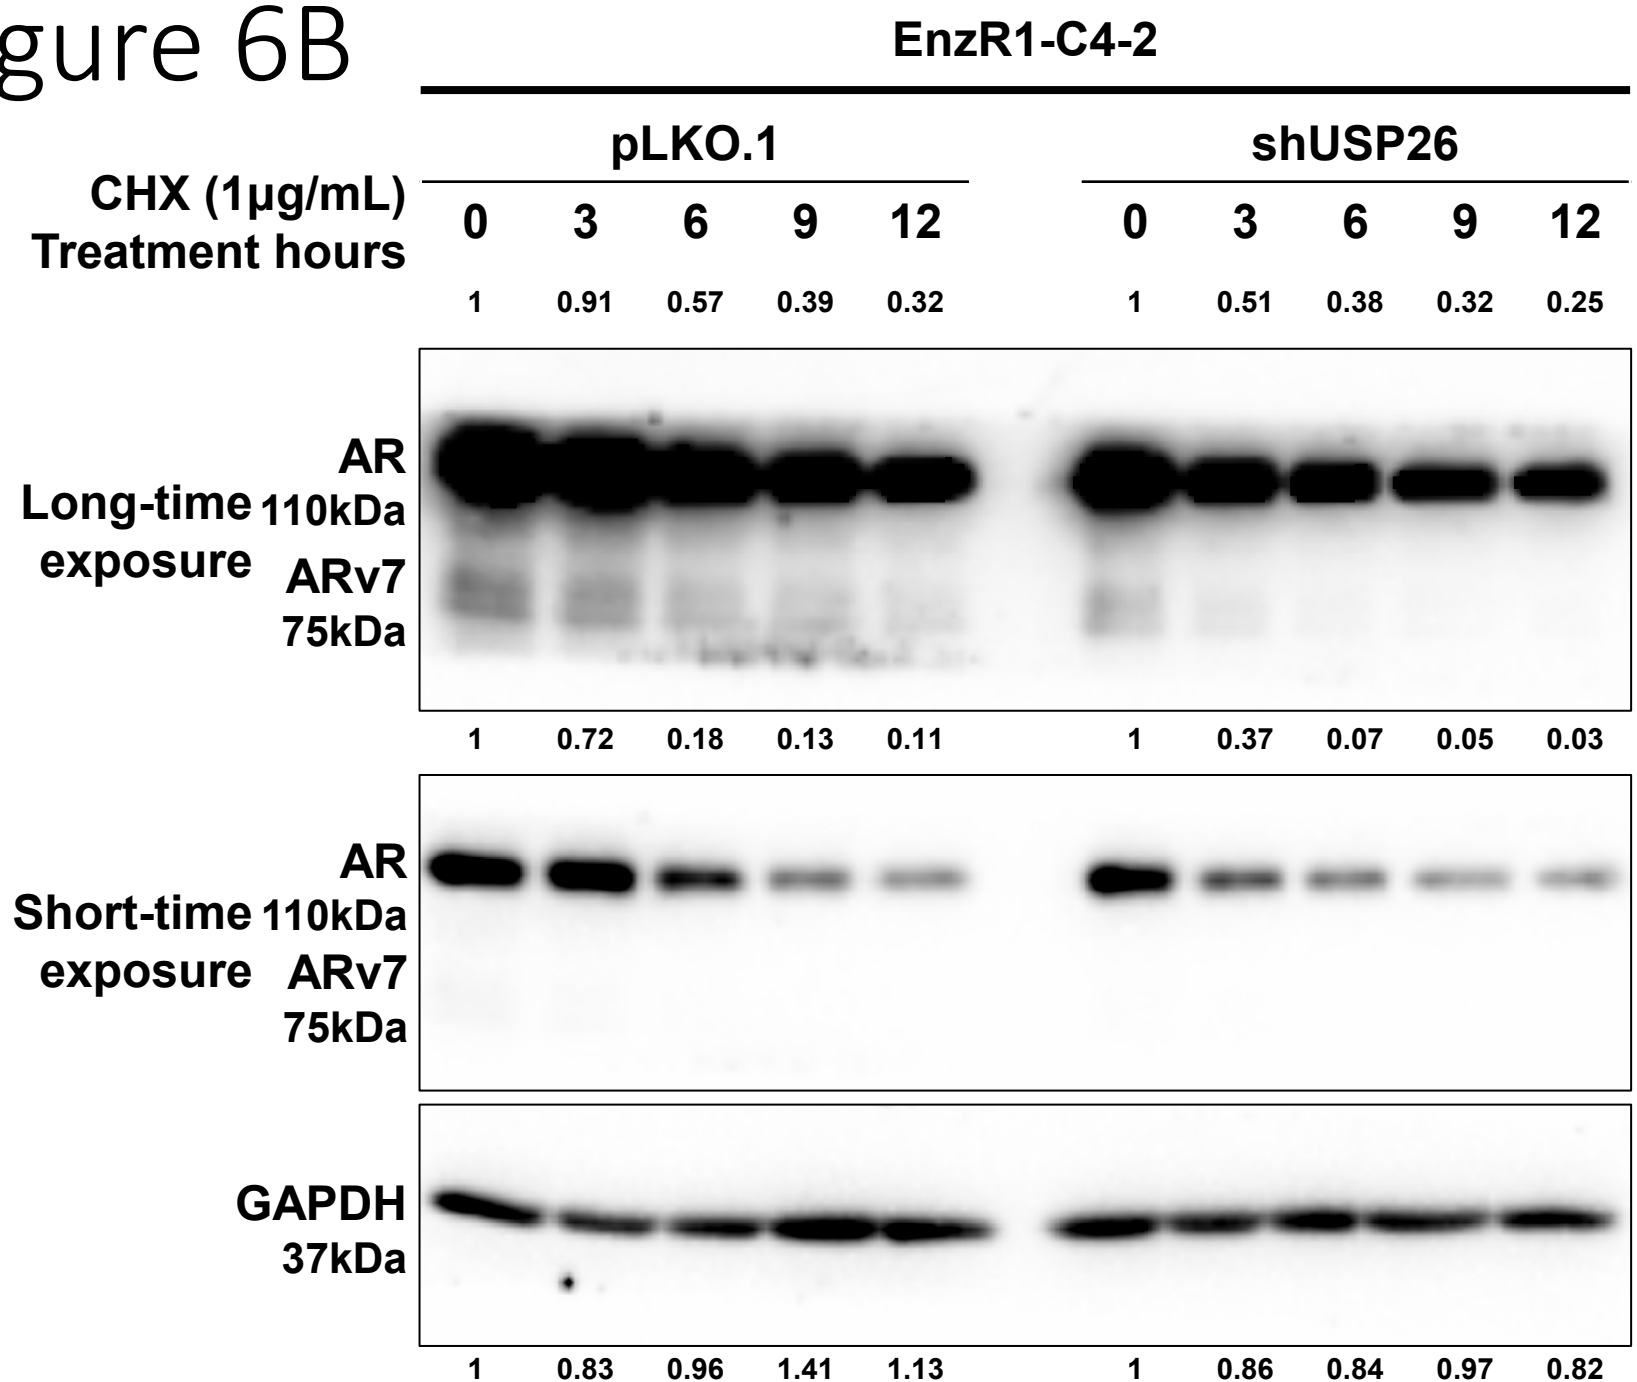

# Figure 6C

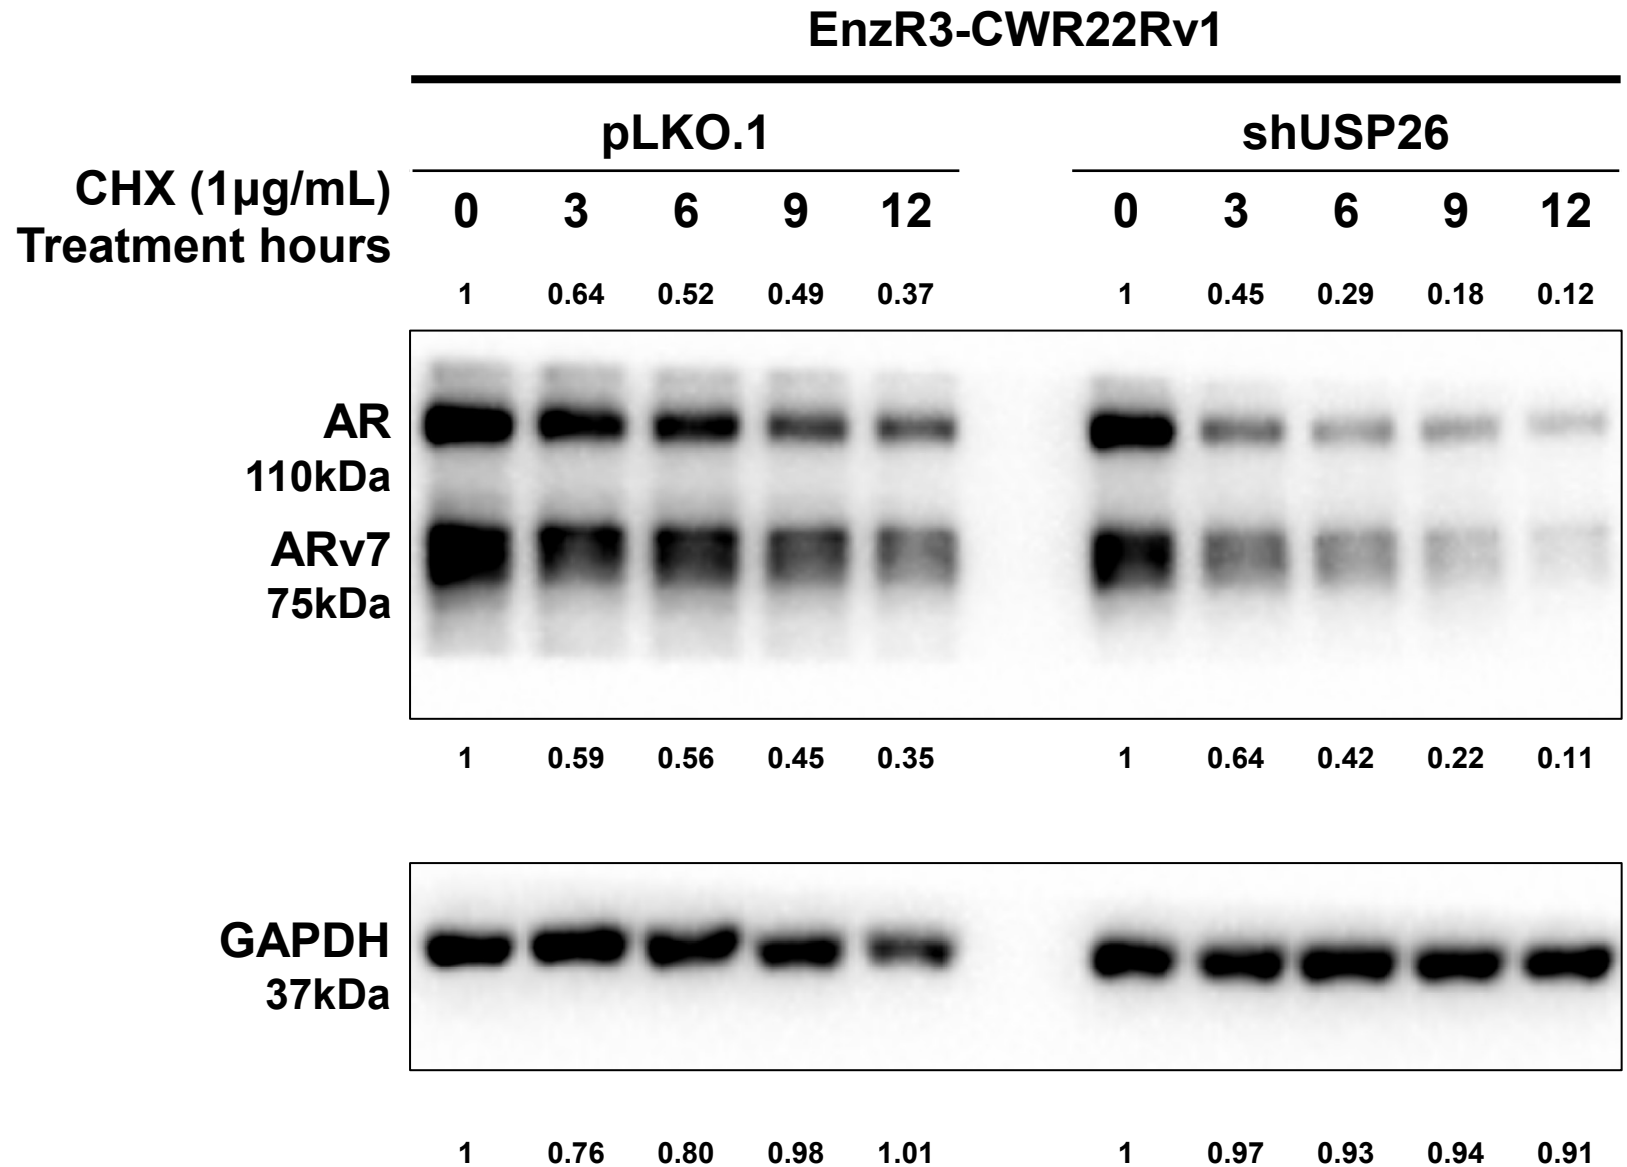

# Figure 6D

EnzS1-C4-2

EnzS1-C4-2

|            |   |   |   |   |
|------------|---|---|---|---|
| MG132 10μM | + | + | + | + |
| shUSP26    | — | + | — | + |
| NAC 3mM    | — | — | + | + |

|            |   |   |   |   |
|------------|---|---|---|---|
| MG132 10μM | + | + | + | + |
| shUSP26    | — | + | — | + |
| NAC 3mM    | — | — | + | + |

Long-time  
exposure

AR  
110kDa

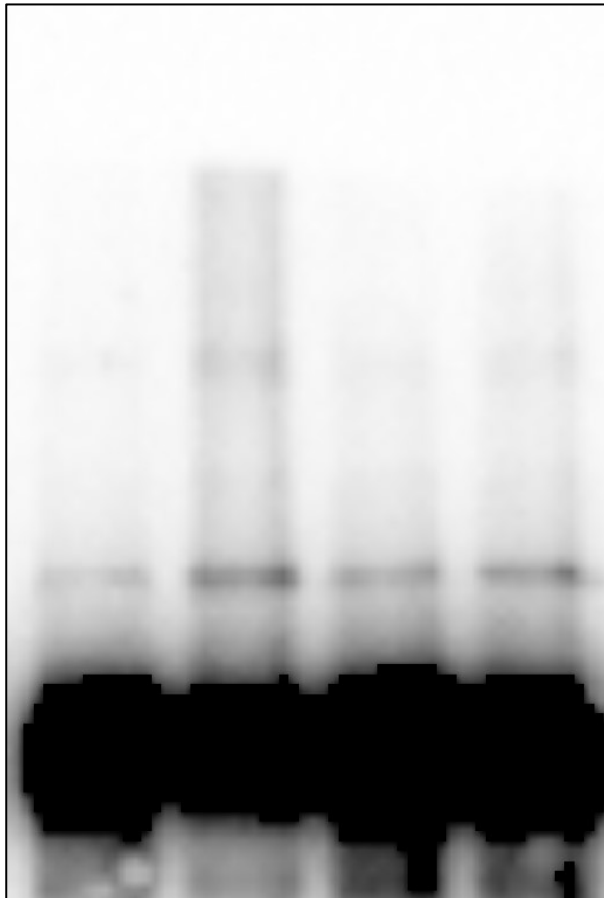

Short-time  
exposure

AR  
110kDa

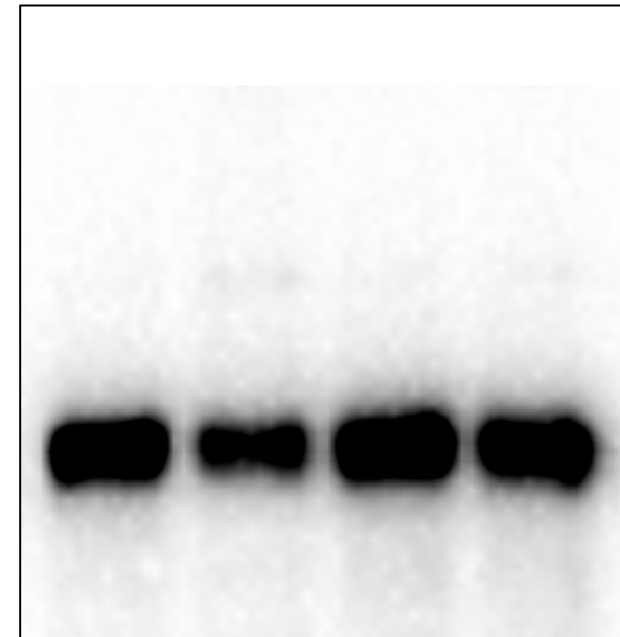

1 0.58 1.02 0.87

GAPDH  
37kDa

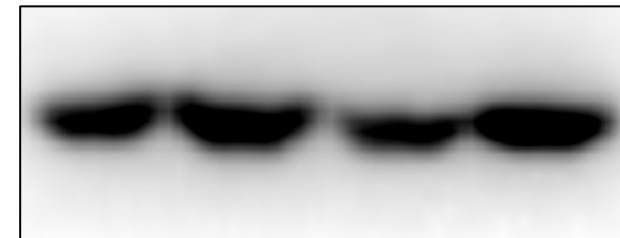

1 1.30 0.92 1.35

# Figure 6E

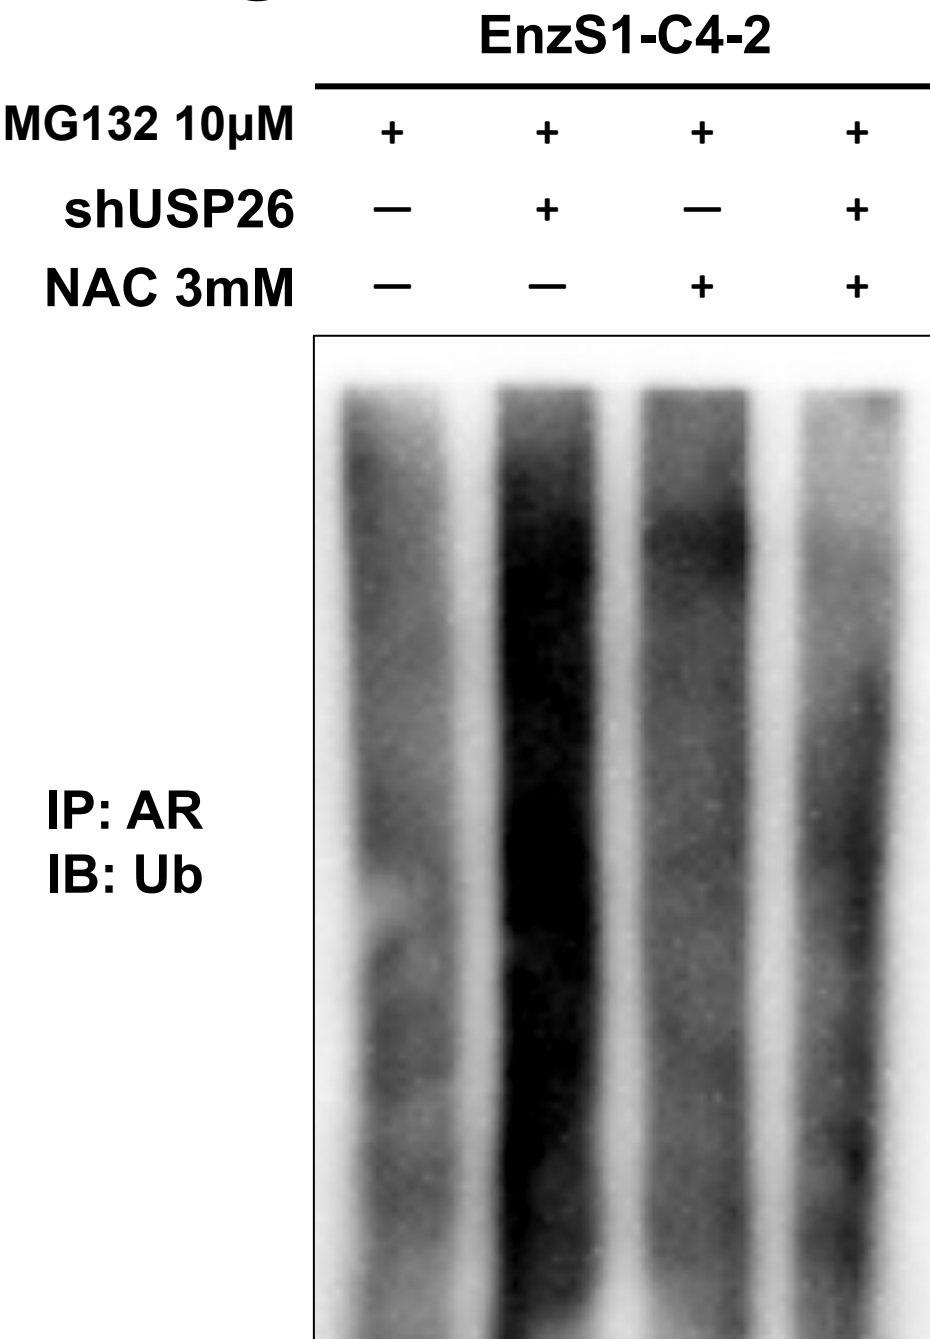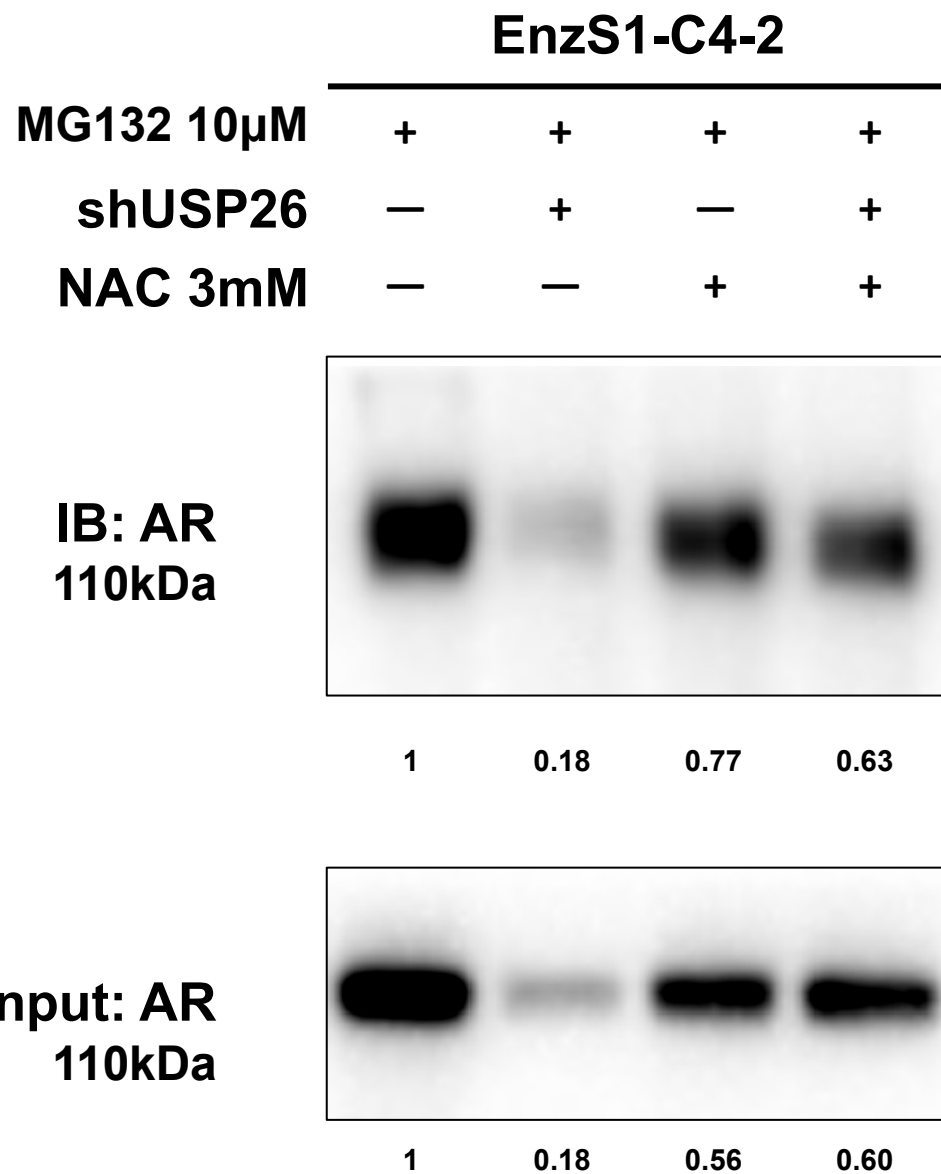

# Figure 6F

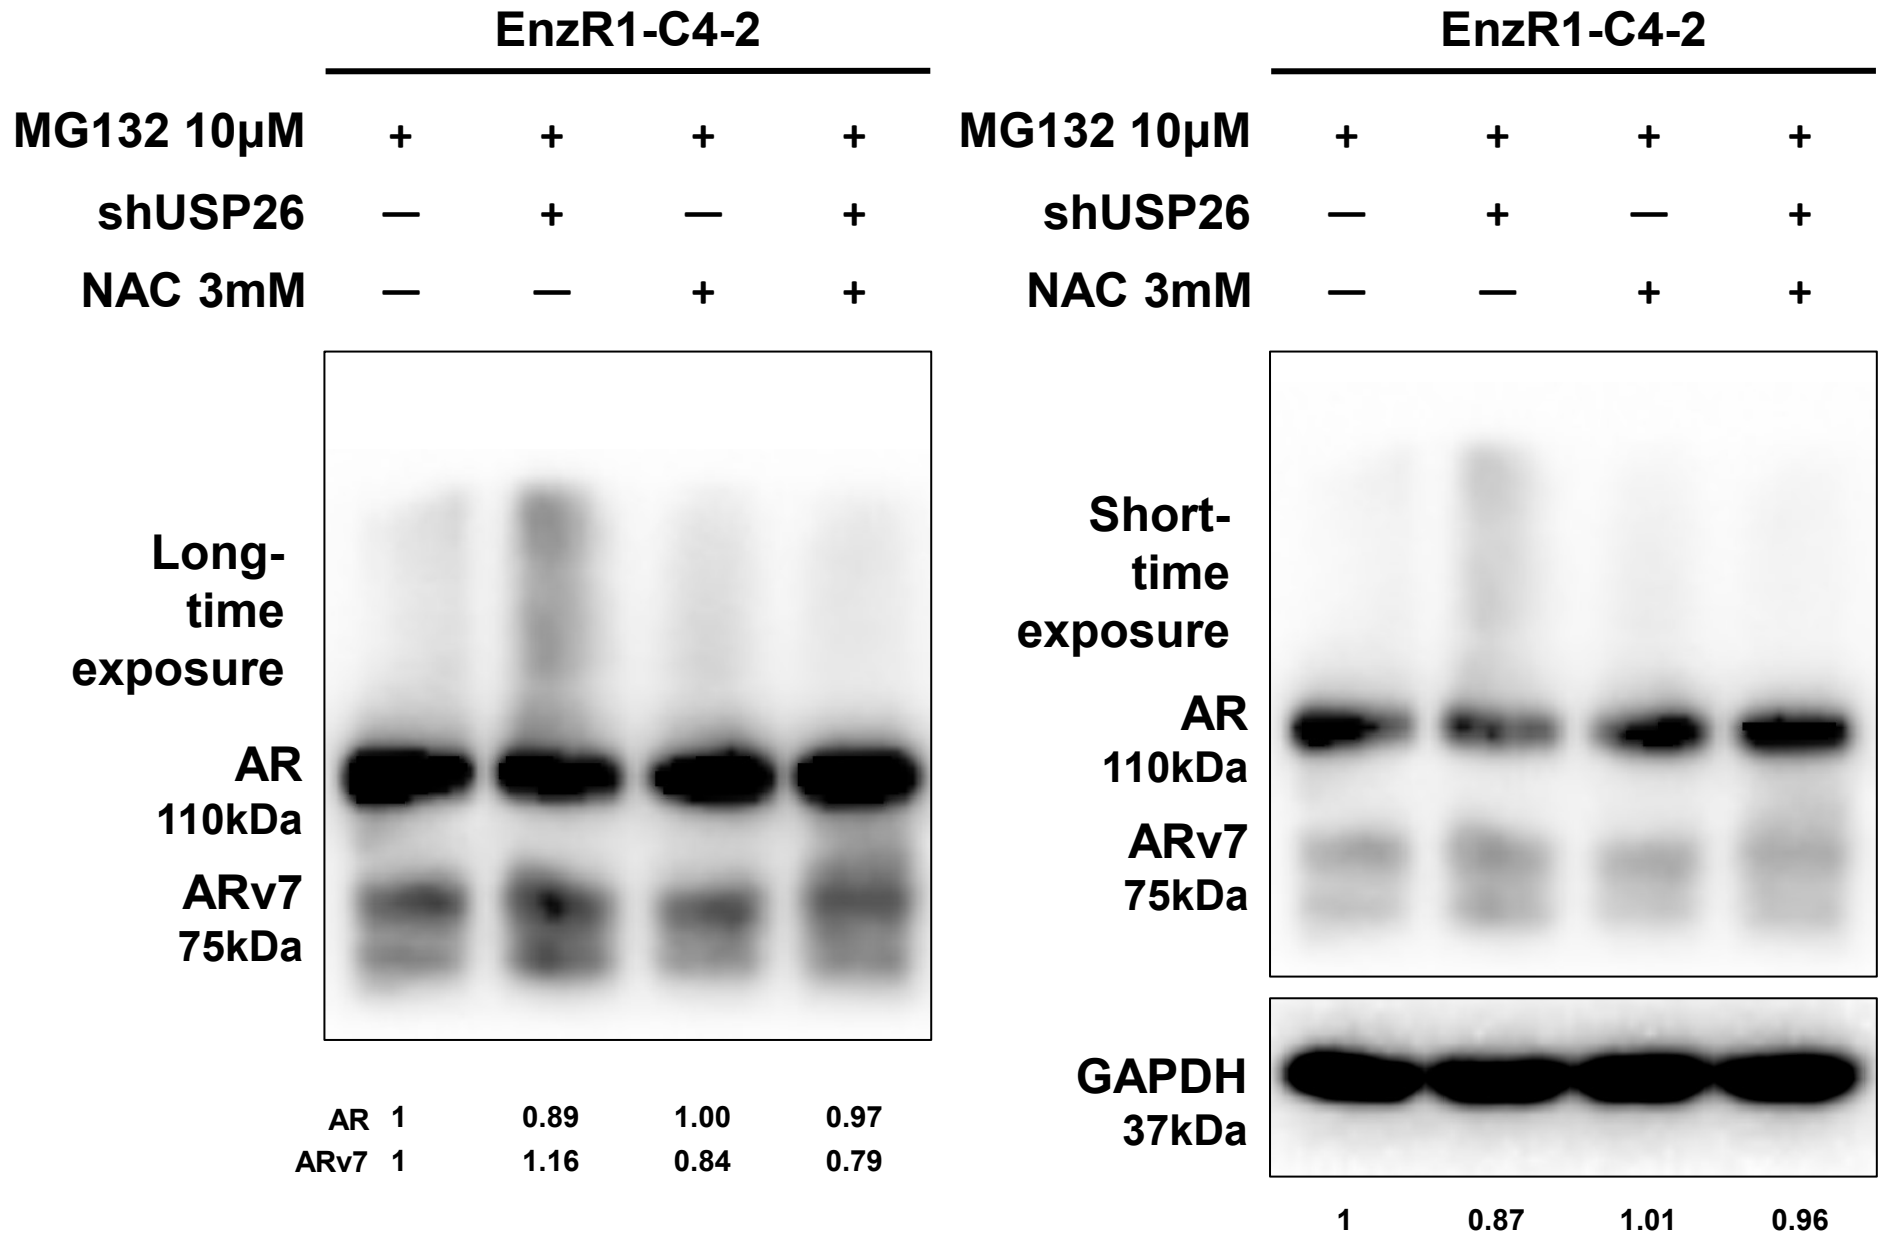

Figure 6G

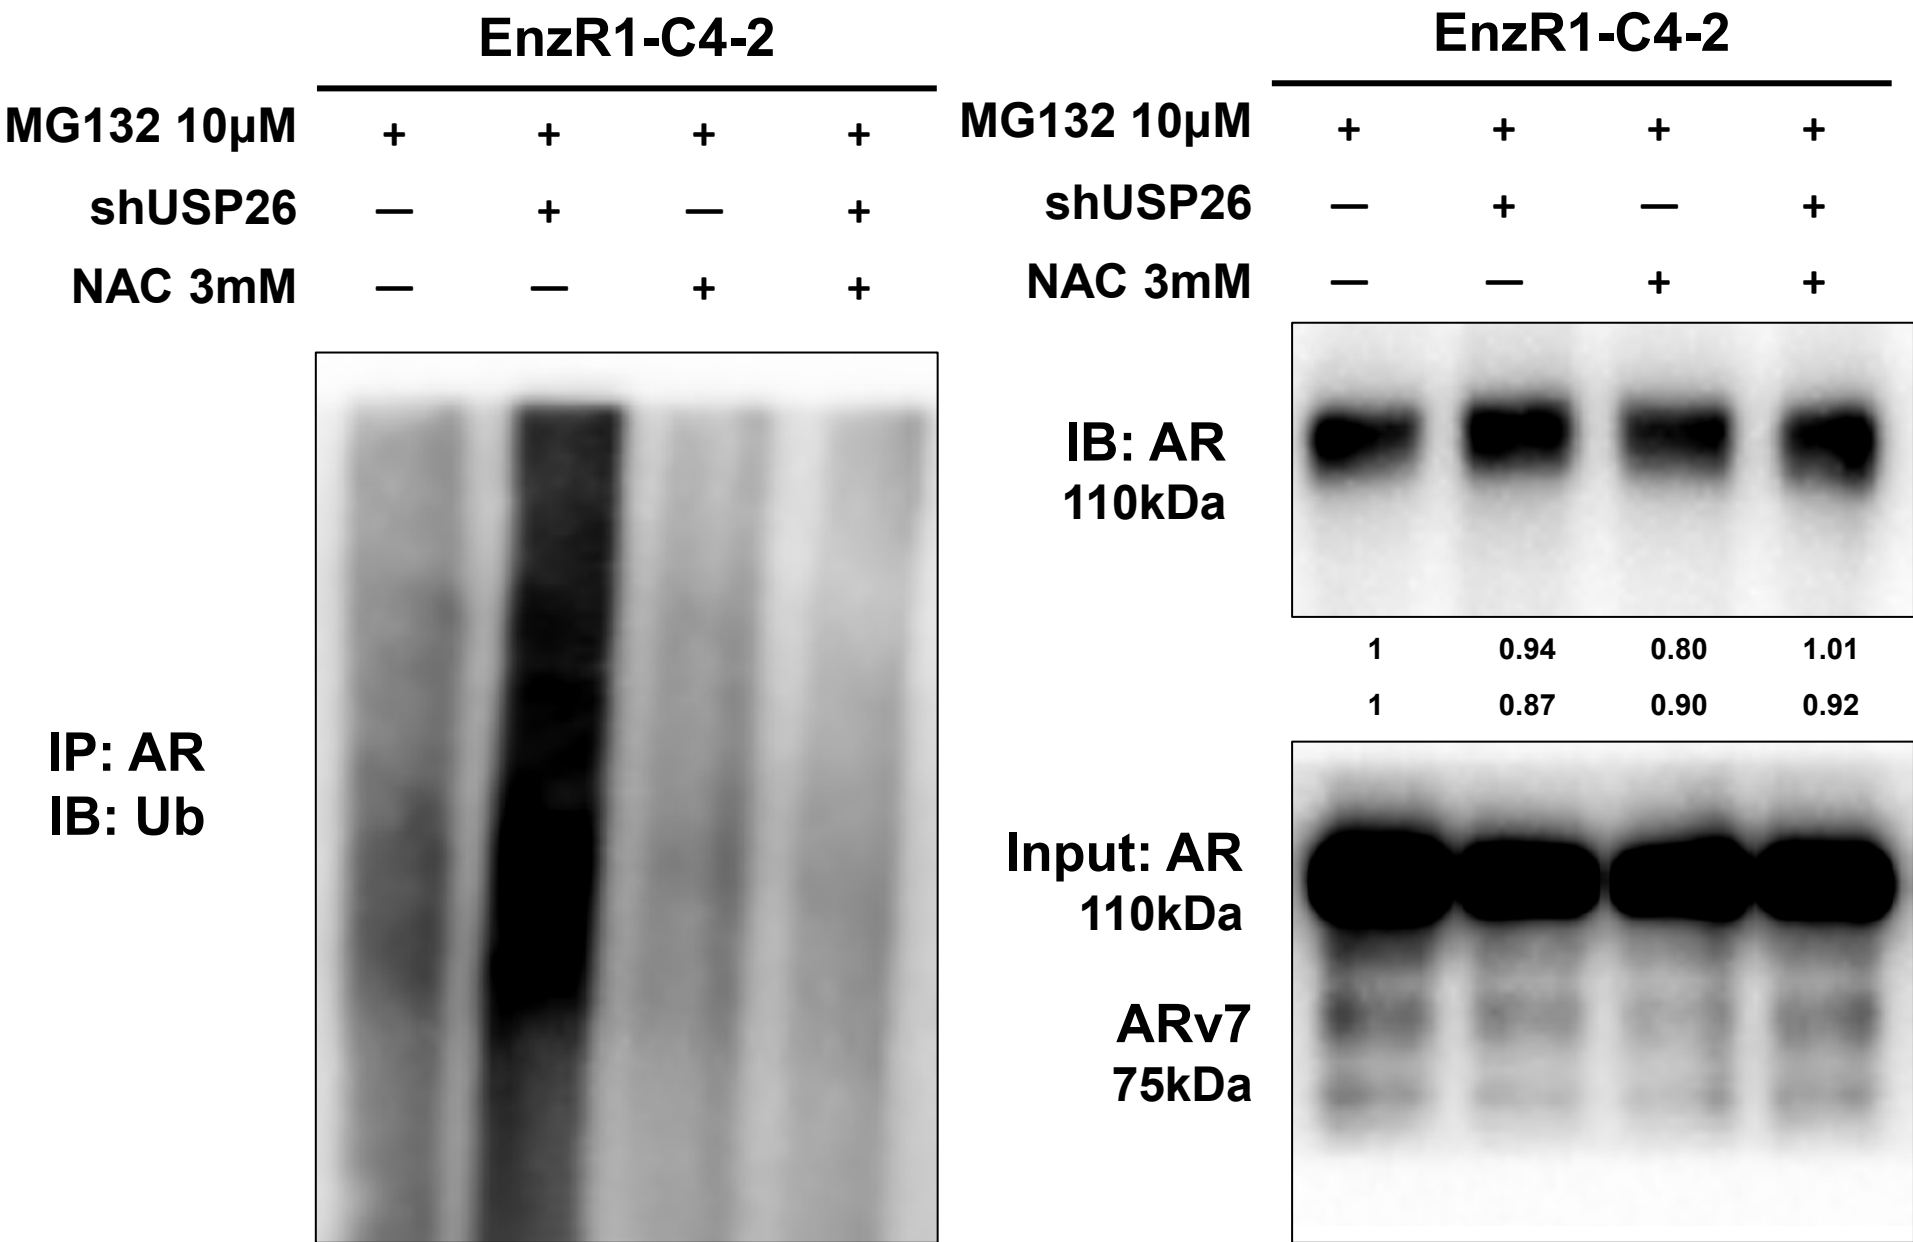



Figure 6H

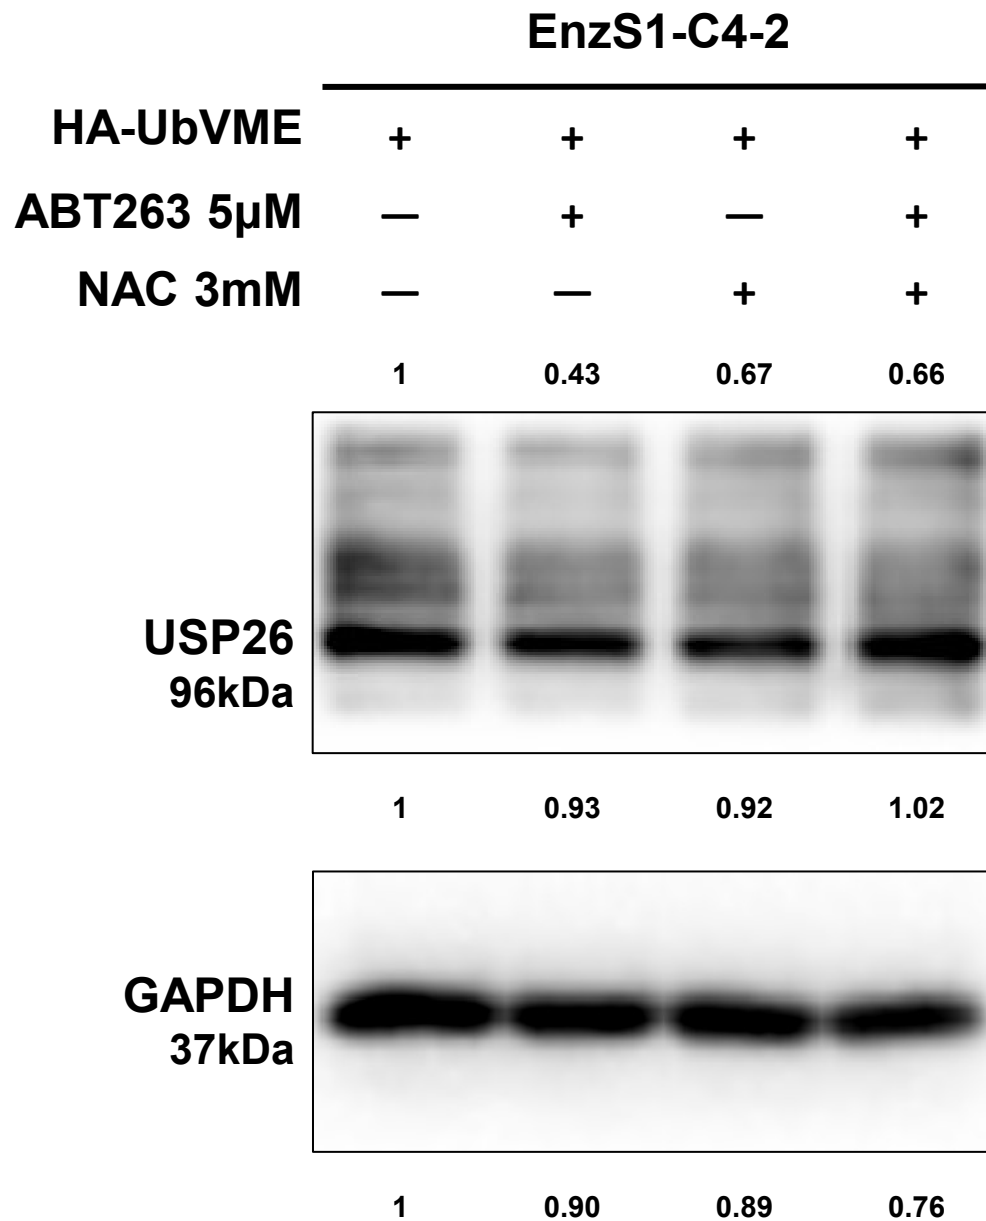

# Figure 6l

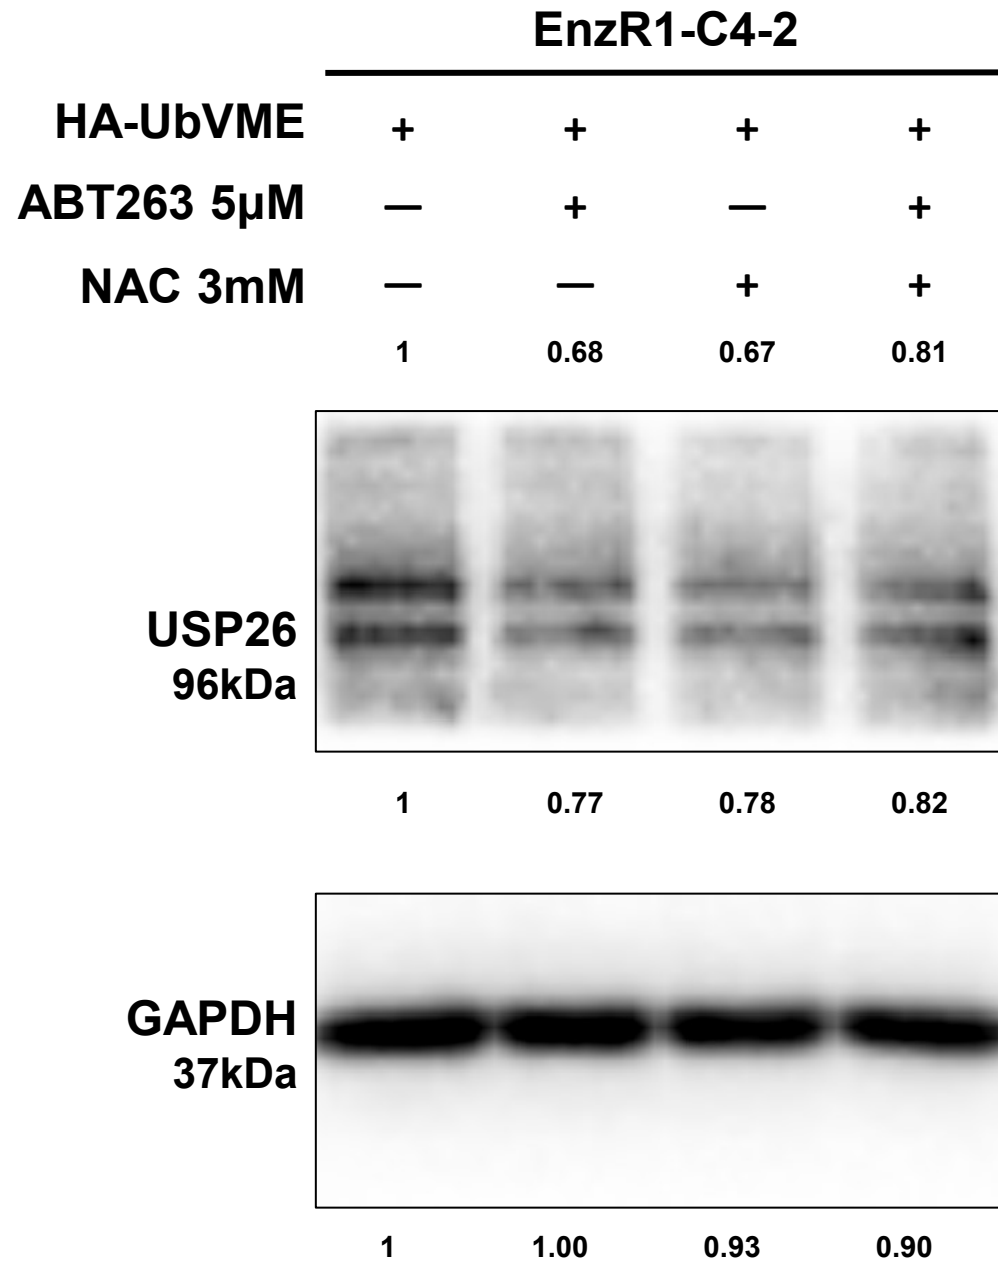

Figure 6J

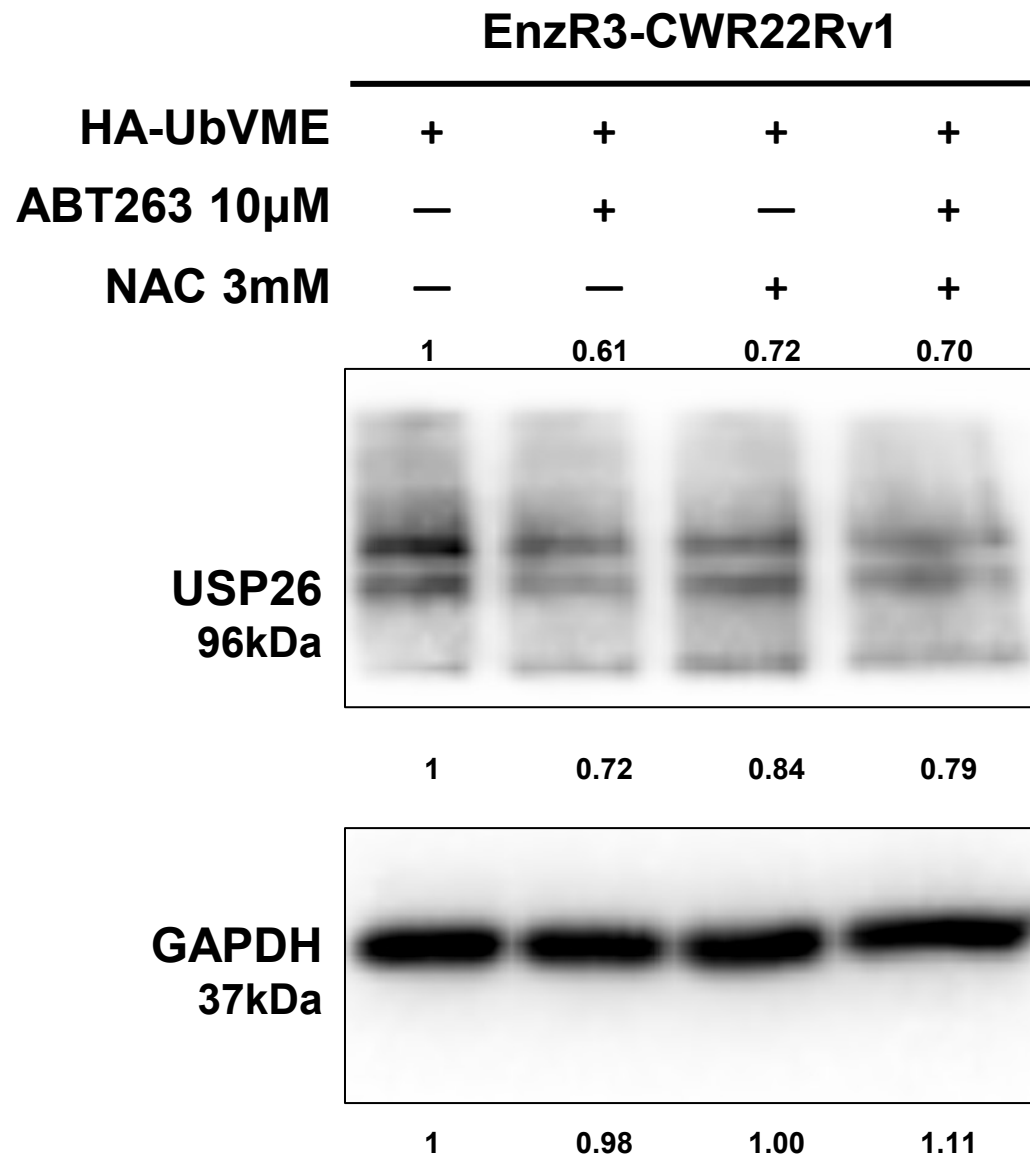

Supplement: s1 [file s1]
