# Supplementary material for: Preclinical Study Using ABT263 to Increase Enzalutamide Sensitivity to Suppress Prostate Cancer Progression Via Targeting BCL2/ROS/USP26 Axis Through Altering ARv7 Protein Degradation
Source: MDPI journal article supplement (doi:10.3390/cancers12040831), 2020-03-30
Supplement: s1 [file s1]

Article

# Preclinical Study Using ABT263 to Increase Enzalutamide Sensitivity to Suppress Prostate Cancer Progression Via Targeting BCL2/ROS/USP26 Axis Through Altering ARv7 Protein Degradation

Hua Xu <sup>1,2,3,4,#</sup>, Yin Sun <sup>3,4,#</sup>, Chi-Ping Huang <sup>5</sup>, Bosen You <sup>3,4</sup>, Dingwei Ye <sup>1,2,\*</sup> and Chawnshang Chang <sup>3,4,5\*</sup>

<sup>1</sup> Department of Urology, Fudan University Shanghai Cancer Center, Shanghai 200032, China

<sup>2</sup> Department of Oncology, Shanghai Medical College, Fudan University, Shanghai 200032, China

<sup>3</sup> George Whipple Lab for Cancer Research, Departments of Pathology, Urology, and Radiation Oncology, University of Rochester Medical Center, Rochester, NY 14646, USA

<sup>4</sup> The Wilmot Cancer Institute, University of Rochester Medical Center, Rochester, NY 14646, USA

<sup>5</sup> Sex Hormone Research Center and Department of Urology, China Medical University, Taichung 404, Taiwan

# These authors contributed equally to this work.

\* Correspondence: dwyeli@163.com (D.Y.); chang@urmc.rochester.edu (C.C.)

Supplementary Figures:

Supplement Fig. 1

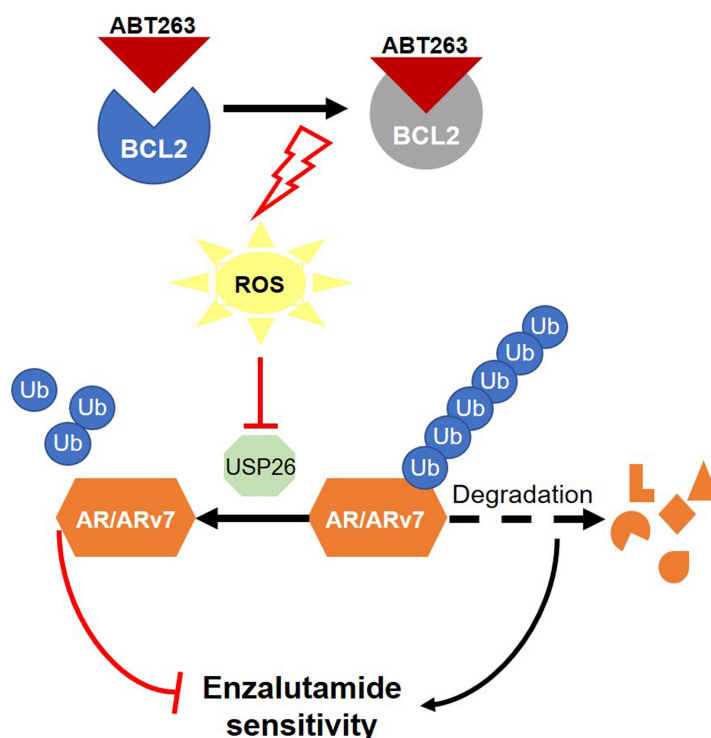

**Supplement Fig. 1.** Model of ABT263 increased Enz sensitivity of PCa. ABT263, as a selective antagonist of BCL2, induces cellular ROS and inhibits USP26 activity. The ubiquitination of AR/ARv7 increases due to inhibition of USP26, resulting in increased degradation of AR/ARv7. Decreased AR/ARv7 expression by ABT263 contributes to increased Enz sensitivity of PCa.

Supplement Fig. 2

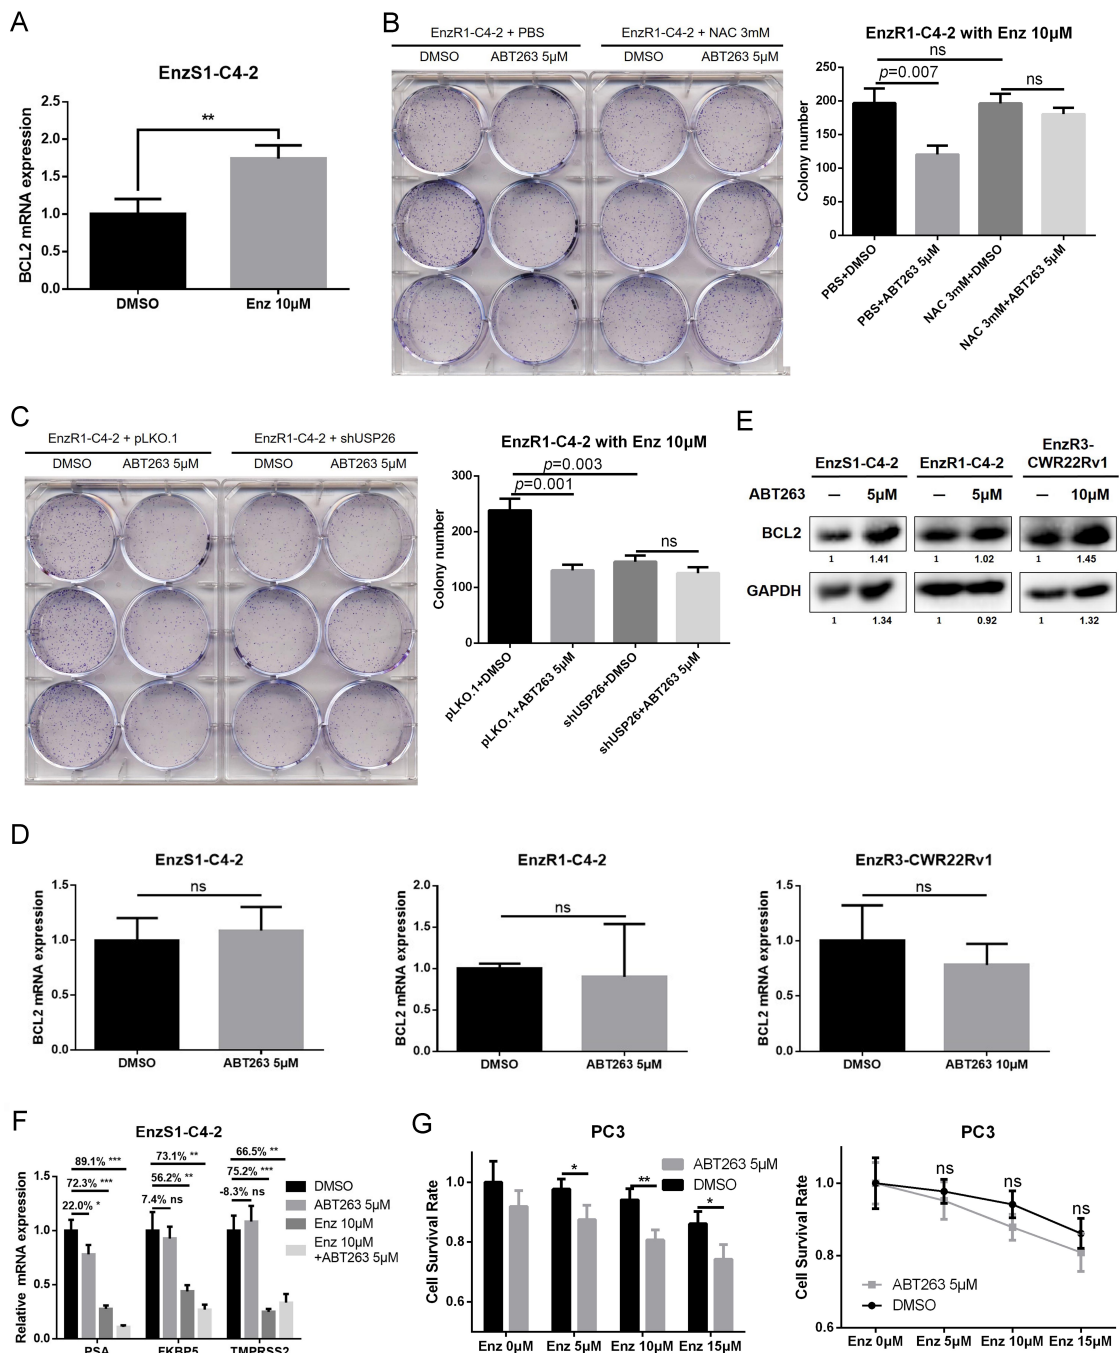

**Supplement Fig. 2. A:** BCL2 mRNA expression increased in response to Enz treatment for 48 hours in EnzS1-C4-2 cells. **B-C:** ABT263 suppresses EnzR1-C4-2 cell colony formation, which could be reversed by NAC (**B**) and shUSP26 (**C**). **D-E:** ABT263 doesn't decrease BCL2 expression. BCL2 mRNA and protein expression were detected after 48 hours ABT263 treatment. Q-PCR assay was applied to measure BCL2 mRNA (**D**), and western blot assay was applied to measure BCL2 protein expression (**E**) in EnzS1-C4-2 cells, EnzR1-C4-2 cells, and EnzR3-CWR22Rv1 cells. **F:** Combination of ABT263 and Enz treatment better suppresses AR target gene expression. Q-PCR assay was applied to measure the mRNA expression of AR target genes (PSA, FKBP5, and TMPRSS2) in EnzS1-C4-2 cells after combination treatment of ABT263 and Enz or ABT263 and Enz treatment alone. **G:** Targeting BCL2 with ABT263 doesn't increase sensitivity for Enzalutamide in PC3 cells. Data are presented as Mean  $\pm$  SD. \*:  $p < 0.05$ , \*\*:  $p < 0.01$ , \*\*\*:  $p < 0.001$ , ns: not significant.

## Supplement Fig. 3

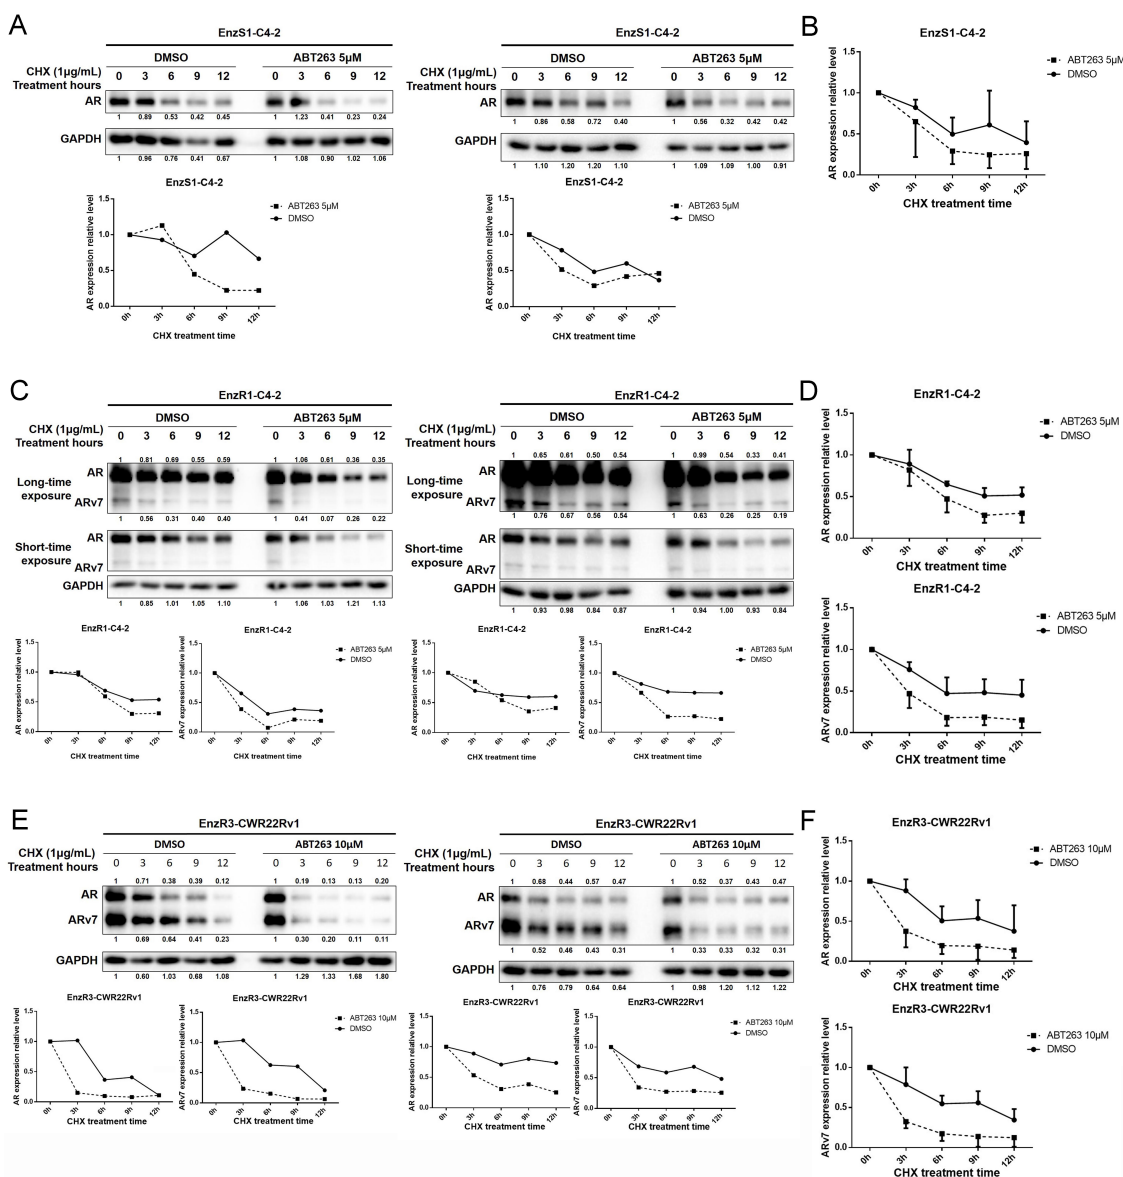

**Supplement Fig. 3.** ABT263 decreases AR and ARv7 protein stability. As described in Fig. 2, stability of AR and ARv7 in EnzS1-C4-2 cells (A), in EnzR1-C4-2 cells (C) and in EnzR3-CWR22Rv1 cells (E) was measured by western blot assay another two times. Chemiluminescence on the western blot detected with short and long length of time, are shown in C and E. Note that ARv7 is more visible with longer exposure time. Together with data in Fig. 2C-E, line graphs of AR/ARv7 protein stability were drawn, showing similar decreasing trend of AR/ARv7 stability in EnzS1-C4-2 (B), EnzR1-C4-2 (D), and EnzR3-CWR22Rv1 (F) cells after ABT263 treatment. Data are presented as Mean  $\pm$  SD.

Supplement Fig. 4

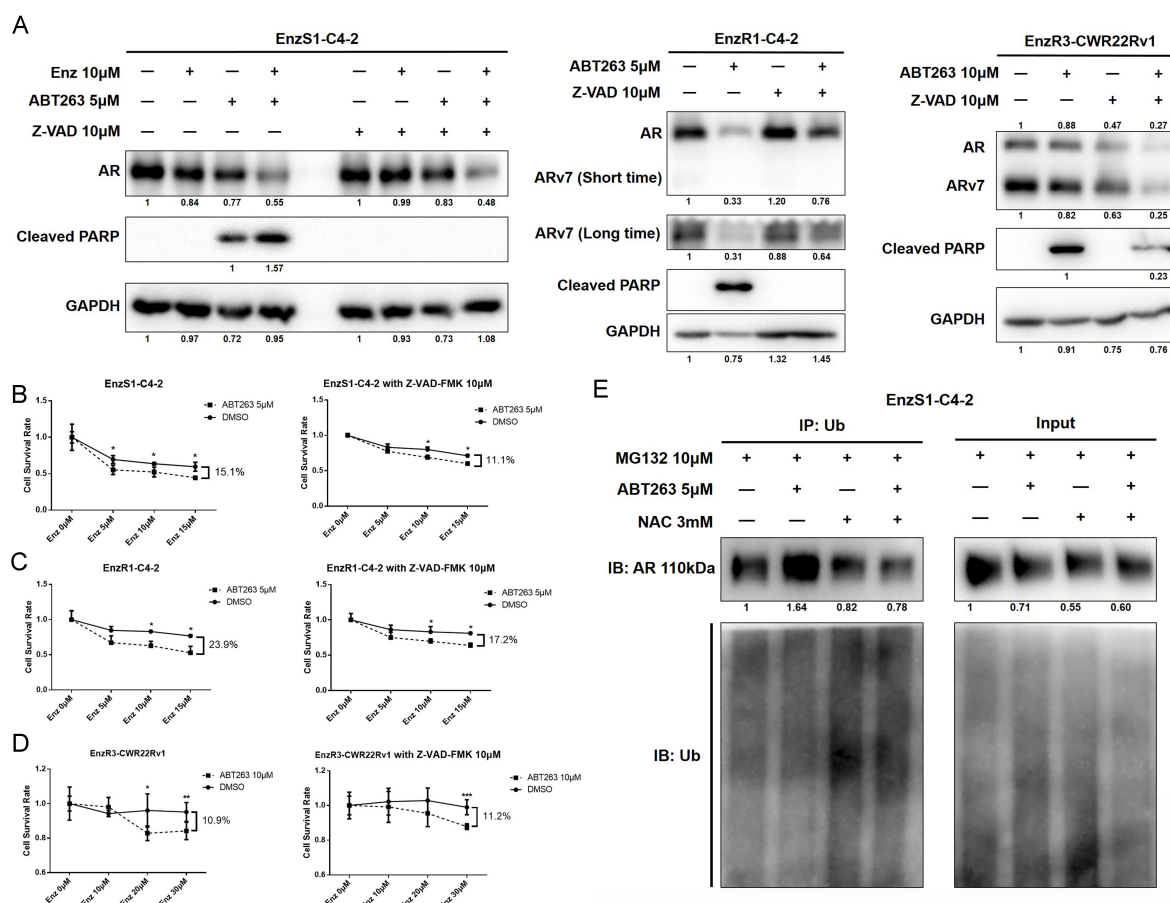

**Supplement Fig. 4.** ABT263-induced apoptosis didn't contribute to the increase of Enz-sensitivity and AR/ARv7 degradation. **A:** ABT263-induced apoptosis didn't contribute to AR and ARv7 degradation. Z-VAD-FMK (Z-VAD) was used to reverse the cell apoptosis induced by ABT263. Western blot assay was applied to measure AR and ARv7 protein expression in EnzS1-C4-2 cells, EnzR1-C4-2 cells, and EnzR3-CWR22Rv1 cells. Two exposures, short and long time, are shown in EnzR1-C4-2 cells. Note that ARv7 in EnzR1-C4-2 cells is more visible with longer exposure time. **B-D:** ABT263-induced apoptosis didn't contribute to the increase of Enz-sensitivity. MTT proliferation assays were used to detect cell proliferation rates in EnzS1-C4-2 cells (**B**), EnzR1-C4-2 cells (**C**), and EnzR3-CWR22Rv1 cells (**D**). **E:** NAC reverses the ABT263 increased ubiquitination of AR in EnzS1-C4-2. Data are presented as Mean  $\pm$  SD. \*:  $p < 0.05$ , \*\*:  $p < 0.01$ , \*\*\*:  $p < 0.001$ .



Supplement Fig. 5

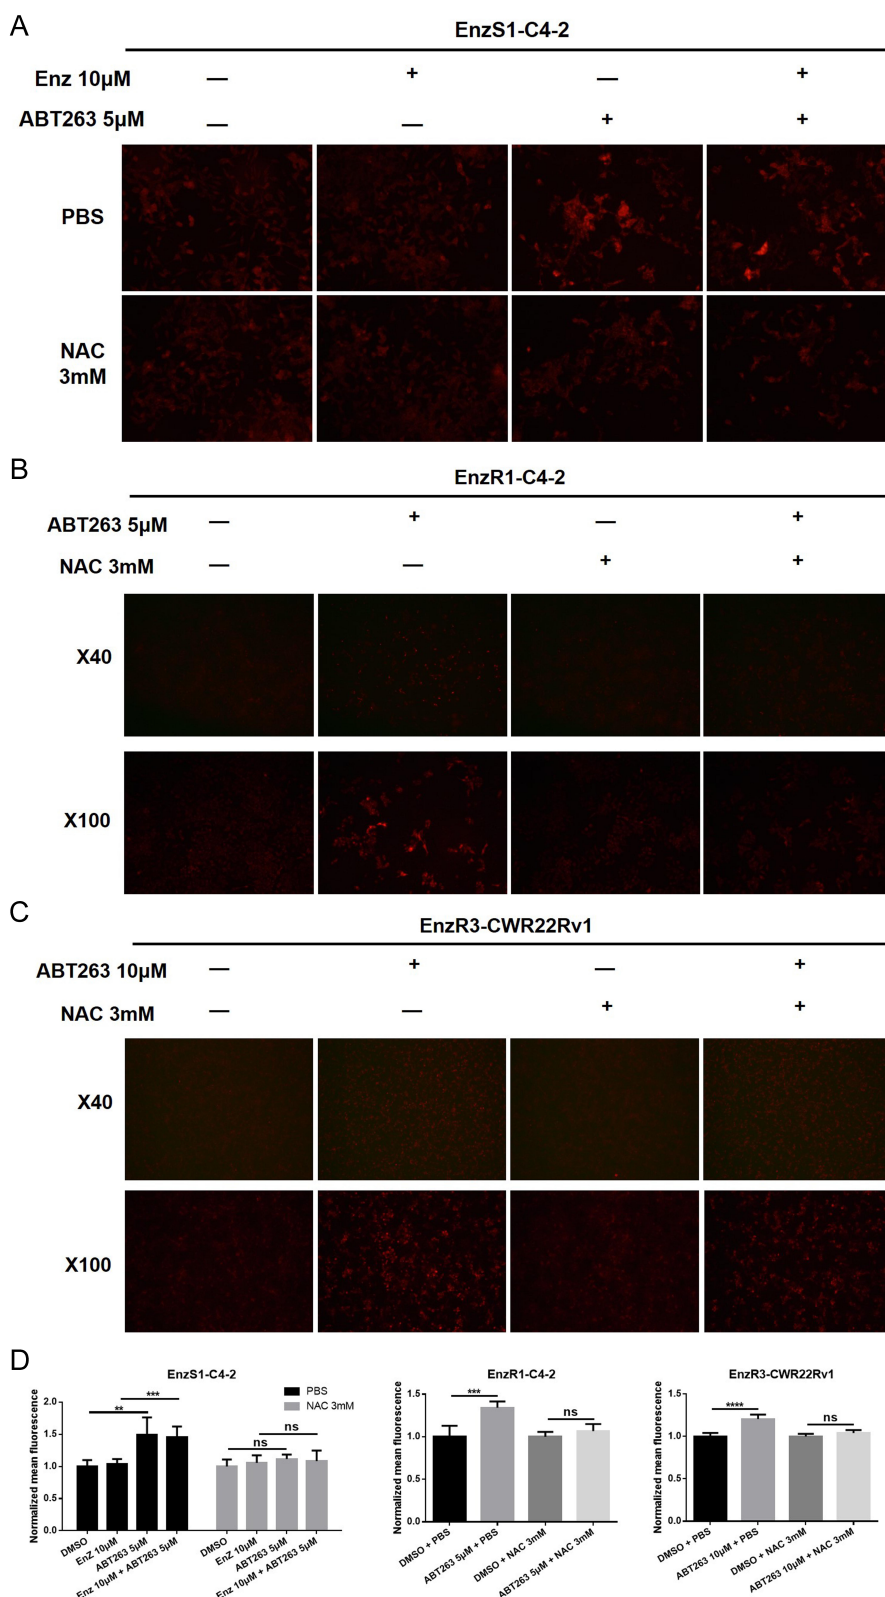

**Supplement Fig. 5.** NAC reverses cellular ROS induced by ABT263. **A-D:** DHE staining was applied to detect cellular ROS level in EnzS1-C4-2 cells (**A**), EnzR1-C4-2 cells (**B**) and EnzR3-CWR22Rv1 cells (**C**). Fluorescence (excitation wavelength 485 nm and an emission wavelength 580 nm) was measured to quantify the cellular ROS level and showed that NAC reversed cellular ROS induced by ABT263 (**D**). Data are presented as Mean  $\pm$  SD. \*\*:  $p < 0.01$ , \*\*\*:  $p < 0.001$ , \*\*\*\*:  $p < 0.0001$ , ns: not significant.

Supplement Fig. 6

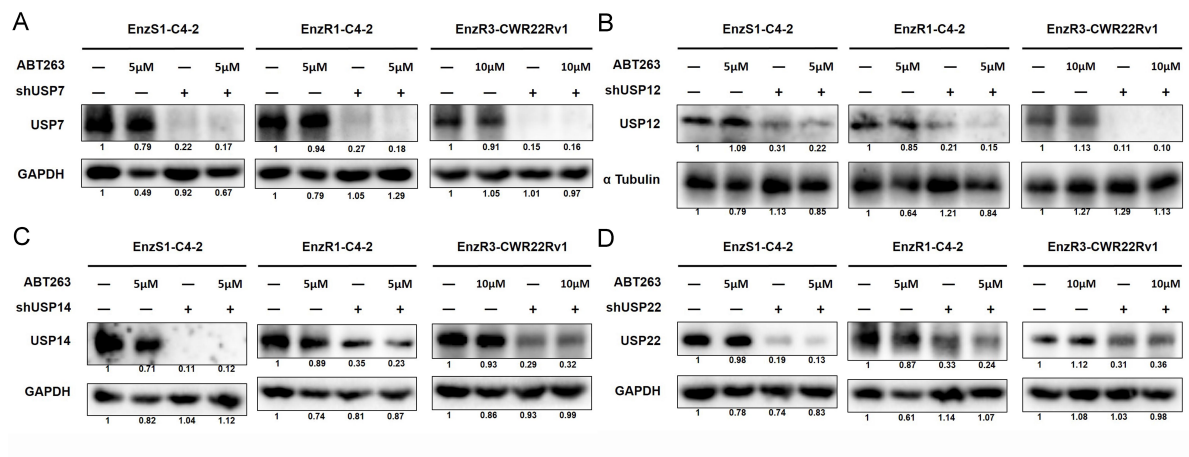

**Supplement Fig. 6.** Confirming the knock down efficiency of shUSPs. Western blot assays were applied to confirm the knock down efficiency of shUSP7 (**A**), shUSP12 (**B**), shUSP14 (**C**), and shUSP22 (**D**). Data are presented as Mean  $\pm$  SD.

## Supplement Fig. 7

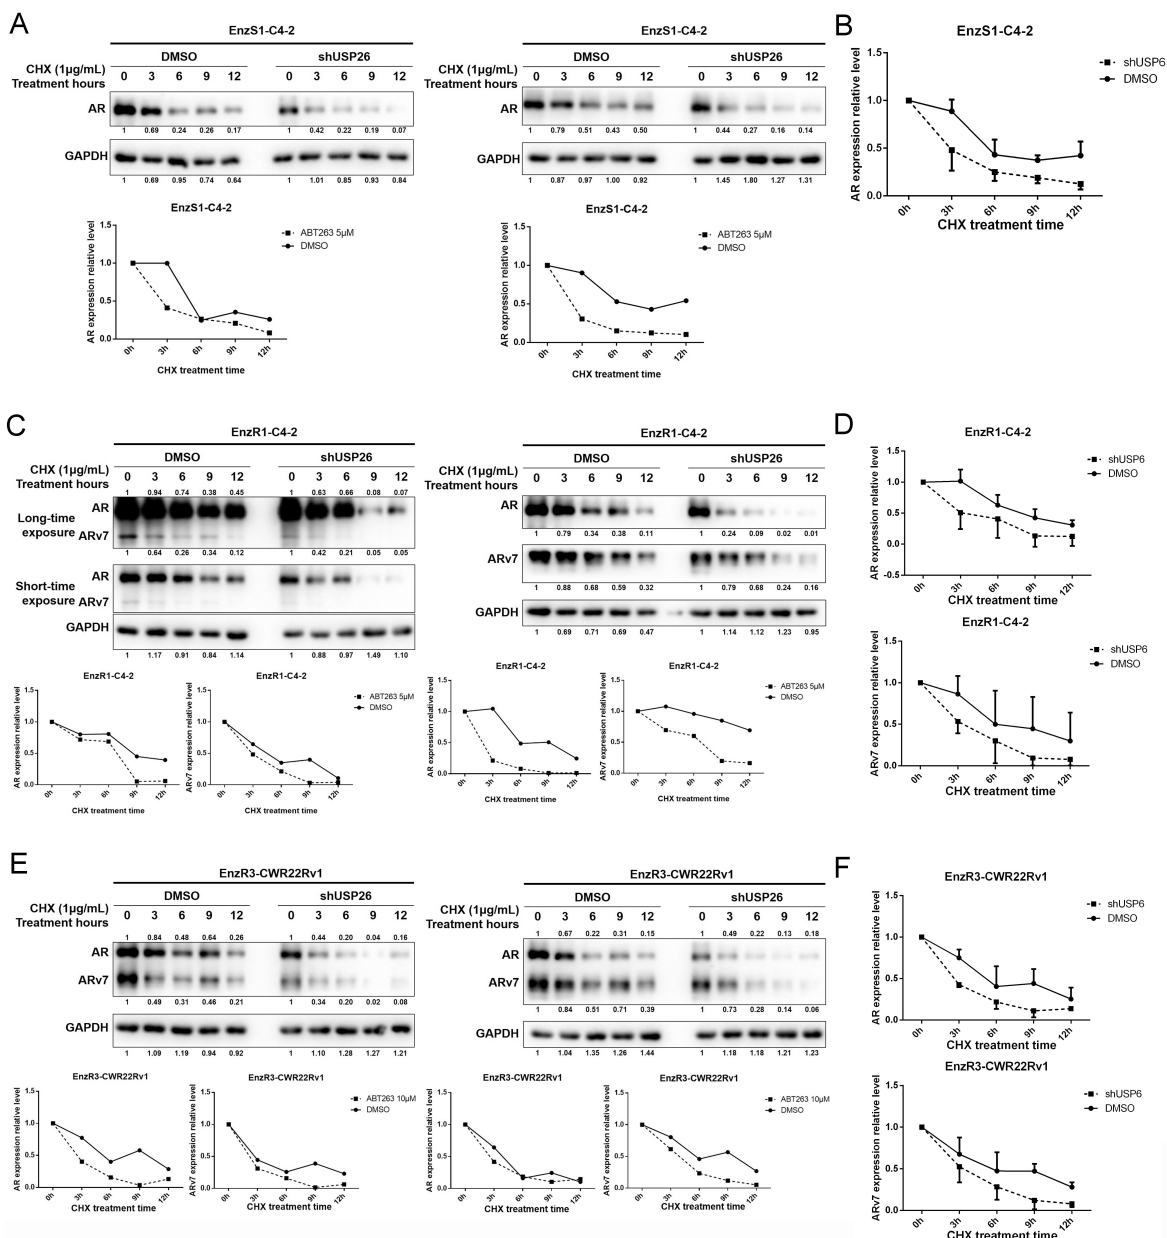

**Supplement Fig. 7.** USP26 contributes to protein stability of AR and ARv7. As described in Fig. 6, stability of AR and ARv7 in EnzS1-C4-2 cells (A), in EnzR1-C4-2 cells (C) and in EnzR3-CWR22Rv1 cells (D) was measured by western blot assay for another two times. Together with data in Fig. 6A-C, line graphs of AR/ARv7 protein stability were drawn, showing similar decreasing trend of AR/ARv7 stability in EnzS1-C4-2 (B), EnzR1-C4-2 (D), and EnzR3-CWR22Rv1 (F) cells after knocking down USP26. Data are presented as Mean  $\pm$  SD.

76

## Supplementary Table:

Table S1: Plasmid information used in the study

| Gene_ID | Vector  | Application      | Sequence                                                                     |
|---------|---------|------------------|------------------------------------------------------------------------------|
| USP7    | pLKO.01 | Knocking<br>down | F: CCGGTAGTATCTTGAATAAATCCTGCTCTTTGGATCCGAGAGC                               |
|         |         |                  | AGGATTTATTCAAGATACTATTTTTG                                                   |
|         |         |                  | R: AATTCAAAAATAGTATCTTGAATAAATCCTGCTCTCGGATCCAA<br>AGAGCAGGATTTATTCAAGATACTA |
| USP12   | pLKO.01 | Knocking<br>down | F: CCGGCGTAGAATTCTTCAATAGCTTGTGCTTGGATCCGGCACA                               |
|         |         |                  | AGCTATTGAAGAATTCTACGTTTTTG                                                   |
|         |         |                  | R: AATTCAAAAACGTAGAATTCTTCAATAGCTTGTGCCGGATCCAA<br>GCACAAGCTATTGAAGAATTCTACG |
| USP14   | pLKO.01 | Knocking<br>down | F: CCGGACTGCTTGTAAGTCATAGTATCCACTTGGATCCGGTGGA                               |
|         |         |                  | TACTATGACTTACAAGCAGTTTTTTG                                                   |
|         |         |                  | R: AATTCAAAAACTGCTTGTAAGTCATAGTATCCACCGGATCCAA<br>GTGGATACTATGACTTACAAGCAGT  |
| USP22   | pLKO.01 | Knocking<br>down | F: CCGGGGTACTGTCCATTCATCCTGCTCTCTTGGATCCGGAGAG                               |
|         |         |                  | CAGGATGAATGGACAGTACCTTTTTG                                                   |
|         |         |                  | R: AATTCAAAAAGGTACTGTCCATTCATCCTGCTCTCCGGATCCAA<br>GAGAGCAGGATGAATGGACAGTACC |
| USP26   | pLKO.01 | Knocking<br>down | F: CCGGAATGTGTGGAGCCAGGATATCTTGGATCCGGATATCCTG                               |
|         |         |                  | GCTCCACACATTTTTTTG                                                           |
|         |         |                  | R: AATTCAAAAAAATGTGTGGAGCCAGGATATCCGGATCCAAGATA<br>TCCTGGCTCCACACATT         |

77
